# Supplementary material for: Causal Effects of Modifiable Behaviors on Prostate Cancer in Europeans and East Asians: A Comprehensive Mendelian Randomization Study
Source: MDPI journal article supplement (doi:10.3390/biology12050673), 2023-04-29
Supplement: s1 [file s1]

# Causal effects of modifiable behaviors on prostate cancer in Europeans and East Asians: a comprehensive Mendelian randomization study

## Supplementary materials:

|                                                                                                                                            |    |
|--------------------------------------------------------------------------------------------------------------------------------------------|----|
| <b>Text S1.</b> Detailed analytic plan .....                                                                                               | 1  |
| <b>Table S1.</b> Characteristics of GWAS summary data for behaviors and PCa in European ancestry .....                                     | 2  |
| <b>Table S2.</b> Characteristics of GWAS summary data for behaviors and PCa in East Asian ancestry .....                                   | 4  |
| <b>Table S3.</b> Univariable MR result based on IVW method in European discovery .....                                                     | 6  |
| <b>Table S4.</b> Detection of outlying SNPs in European discovery by MR-PRESSO and radial regression ..                                    | 8  |
| <b>Table S5.</b> Univariable MR result based on IVW method in European replication .....                                                   | 10 |
| <b>Table S6.</b> Univariable MR result based on IVW method in East Asian discovery .....                                                   | 12 |
| <b>Table S7.</b> Univariable MR result based on IVW method in East Asian replication .....                                                 | 13 |
| <b>Figure S1.</b> Radial plots to detect outlying SNPs of the 17 traits in the European discovery sample .....                             | 14 |
| <b>Figure S2.</b> Scatter plots of the 17 behavioral factors in relation to PCa in the European discovery sample .....                     | 15 |
| <b>Figure S3.</b> Forest plots of each single SNP of the 17 behavioral factors in relation to PCa in the European discovery sample .....   | 16 |
| <b>Figure S4.</b> Funnel plots of each single SNP of the 17 behavioral factors in relation to PCa in the European discovery sample .....   | 17 |
| <b>Figure S5.</b> Leave-one-out analyses of the 17 behavioral factors in relation to PCa in the European discovery sample .....            | 18 |
| <b>Figure S6.</b> Causal effects of modifiable behavioral factors on prostate cancer by MVMR-LASSO in Europeans and East Asians .....      | 19 |
| <b>Figure S7.</b> Causal effects of modifiable behaviors on prostate cancer by UVMR and MVMR in European replication sample .....          | 20 |
| <b>Figure S8.</b> Scatter plots of the 13 behavioral factors in relation to PCa in the East Asian discovery sample .....                   | 21 |
| <b>Figure S9.</b> Forest plots of each single SNP of the 13 behavioral factors in relation to PCa in the East Asian discovery sample ..... | 22 |

|                                                                                                                                             |    |
|---------------------------------------------------------------------------------------------------------------------------------------------|----|
| <b>Figure S10.</b> Funnel plots of each single SNP of the 13 behavioral factors in relation to PCa in the East Asian discovery sample ..... | 23 |
| <b>Figure S11.</b> Leave-one-out analyses of the 12 behavioral factors in relation to PCa in the East Asian discovery sample .....          | 24 |
| <b>Figure S12.</b> Causal effects of modifiable behaviors on prostate cancer by UVMR and MVMR in East Asian replication sample .....        | 25 |

## Text S1: Detailed analytic plan

- Framework: two-sample univariable and multivariable Mendelian randomization analysis
- Total proportion of phenotypic variation explained by SNPs:  $R^2$   
$$R^2 = \sum [2 \times (1 - \text{MAF}) \times \text{MAF} \times \beta^2 / (\text{SE}^2 \times N)]$$

$\beta$  and SE: the coefficient and standard error for effect size  
MAF: minor allele frequency for each SNP  
N: sample size
- Instrument strength: F-statistic  
$$F = (N - K - 1) / K \times [R^2 / (1 - R^2)]$$

N: sample size  
K: total number of SNPs selected for MR analysis  
 $R^2$ : total proportion of phenotypic variation explained by all the included SNPs
- Statistical power calculation: mRnd platform  
(<https://shiny.cnsgenomics.com/mRnd/>)
- Bias estimate by sample overlapped: <https://sb452.shinyapps.io/overlap/>
- Primary MR analytical approach: random-effects inverse-variance weighted (IVW)
- Heterogeneity detection: Cochran's Q test with  $I^2$  statistics
- Horizontal pleiotropy examination: MR-Egger intercept
- Outlier detection: MR-pleiotropy residual sum and outlier (MR-PRESSO), the radial regression method, and leave-one-out analyses
- Sensitivity analysis: MR-Egger regression, weighted-median, simple-mode, weighted-mode for UVMR; MR-least absolute shrinkage and selection operator (LASSO) method for MVMR
- Statistical software: All analyses were performed using the TwoSampleMR (v0.5.6), MendelianRandomization (v0.6.0), MRPRESSO (v1.0), RadialMR (v1.0) and MVMR (v0.3) packages in R4.1.2 (R Foundation for Statistical Computing, Vienna, Austria).

**Table S1.** Characteristics of GWAS summary data for behaviors and PCa in European ancestry

| <b>Traits</b>                 | <b>GWAS ID</b>         | <b>PubMed ID</b> | <b>Year</b> | <b>Sample size</b>              | <b>No. SNPs</b> | <b>Units</b> | <b>Author</b>    | <b>Consortium</b> |
|-------------------------------|------------------------|------------------|-------------|---------------------------------|-----------------|--------------|------------------|-------------------|
| <b>Prostate cancer</b>        |                        |                  |             |                                 |                 |              |                  |                   |
| Discovery                     | ieu-b-85               | 29892016         | 2018        | Cases: 79,148<br>Total: 140,254 | 20,346,368      | N/A          | Schumacher<br>FR | PRACTICAL         |
| Replication                   | finn-b-<br>C3_PROSTATE | N/A              | 2021        | Cases: 6,311<br>Total: 95,213   | 16,378,835      | N/A          | N/A              | FinnGen           |
| <b>Tobacco smoking</b>        |                        |                  |             |                                 |                 |              |                  |                   |
| Ever smoking                  | ukb-b-20261            | N/A              | 2018        | 461,066                         | 9,851,867       | N/A          | Elsworth B       | MRC-IEU           |
| Smoking initiation            | ieu-b-4877             | 30643251         | 2019        | 632,802                         | 11,802,365      | N/A          | Liu M            | GSCAN             |
| Lifetime smoking index        | N/A                    | 31689377         | 2020        | 462,690                         | 7,683,478       | N/A          | Wootton RE       | UK Biobank        |
| <b>Alcohol drinking</b>       |                        |                  |             |                                 |                 |              |                  |                   |
| Alcohol frequency             | ukb-b-5779             | N/A              | 2018        | 462,346                         | 9,851,867       | SD           | Elsworth B       | MRC-IEU           |
| Alcohol quantity              | ieu-b-73               | 30643251         | 2019        | 335,394                         | 11,887,865      | SD           | Liu M            | GSCAN             |
| <b>Fruit intake</b>           |                        |                  |             |                                 |                 |              |                  |                   |
| Fresh fruit                   | ukb-b-3881             | N/A              | 2018        | 446,462                         | 9,851,867       | SD           | Elsworth B       | MRC-IEU           |
| Dried fruit                   | ukb-b-16576            | N/A              | 2018        | 421,764                         | 9,851,867       | SD           | Elsworth B       | MRC-IEU           |
| <b>Vegetables intake</b>      |                        |                  |             |                                 |                 |              |                  |                   |
| Raw vegetable                 | ukb-b-1996             | N/A              | 2018        | 435,435                         | 9,851,867       | SD           | Elsworth B       | MRC-IEU           |
| Cooked vegetable              | ukb-b-8089             | N/A              | 2018        | 448,651                         | 9,851,867       | SD           | Elsworth B       | MRC-IEU           |
| <b>Physical activity</b>      |                        |                  |             |                                 |                 |              |                  |                   |
| Duration of vigorous activity | ukb-b-13932            | N/A              | 2018        | 251,501                         | 9,851,867       | SD           | Elsworth B       | MRC-IEU           |
| Duration of moderate activity | ukb-b-2346             | N/A              | 2018        | 343,827                         | 9,851,867       | SD           | Elsworth B       | MRC-IEU           |

|                            |                        |          |      |         |            |     |            |                                                  |
|----------------------------|------------------------|----------|------|---------|------------|-----|------------|--------------------------------------------------|
| Duration of light activity | ukb-b-8865             | N/A      | 2018 | 64,949  | 9,851,867  | SD  | Elsworth B | MRC-IEU                                          |
| <b>Sexual behavior</b>     |                        |          |      |         |            |     |            |                                                  |
| Age of initiation          | ebi-a-<br>GCST90000047 | 34211149 | 2021 | 397,338 | 16,359,424 | N/A | Mills MC   | Human<br>Reproductive<br>Behaviour<br>Consortium |
| No. of sexual partner      | ukb-b-4256             | N/A      | 2018 | 378,882 | 9,851,867  | SD  | Elsworth B | MRC-IEU                                          |
| <b>Sleep behavior</b>      |                        |          |      |         |            |     |            |                                                  |
| Insomnia                   | ukb-b-3957             | N/A      | 2018 | 462,341 | 9,851,867  | SD  | Elsworth B | MRC-IEU                                          |
| Nap during day             | ebi-a-<br>GCST011494   | 33568662 | 2021 | 452,633 | 13,024,091 | N/A | Dashti HS  | UK Biobank<br>and GIANT<br>consortium            |
| Daytime dozing             | ukb-b-5776             | N/A      | 2018 | 460,913 | 9,851,867  | N/A | Elsworth B | MRC-IEU                                          |

GIANT, the Genetic Investigation of ANthropometric Traits; GSCAN, GWAS and Sequencing Consortium of Alcohol and Nicotine use; MRC-IEU, the Medical Research Council - Integrative Epidemiology Unit; PRACTICAL, Prostate Cancer Association Group to Investigate Cancer-Associated Alterations in the Genome; N/A, not applicable

**Table S2.** Characteristics of GWAS summary data for behaviors and PCa in East Asian ancestry

| <b>Traits</b>                 | <b>GWAS ID</b>  | <b>Year</b> | <b>Sample size</b>             | <b>SNPs (n)</b> | <b>Author</b> | <b>Consortium</b> |
|-------------------------------|-----------------|-------------|--------------------------------|-----------------|---------------|-------------------|
| <b>Prostate cancer</b>        |                 |             |                                |                 |               |                   |
| Discovery                     | N/A             | 2022        | Cases: 3,343<br>Total: 6,658   | 10,661,929      | ChinaPCa      | ChinaPCa          |
| Replication                   | bbj-a-148       | 2019        | Cases: 5,408<br>Total: 109,347 | 8,878,753       | Ishigaki K    | Biobank Japan     |
| <b>Tobacco smoking</b>        |                 |             |                                |                 |               |                   |
| Ever smoking                  | ukb-e-20160_EAS | 2020        | 2,649                          | 82,146,731      | Pan-UKB team  | Pan-UKB           |
| <b>Alcohol drinking</b>       |                 |             |                                |                 |               |                   |
| Alcohol frequency             | ukb-e-1558_EAS  | 2020        | 2,658                          | 8,256,422       | Pan-UKB team  | Pan-UKB           |
| <b>Fruit intake</b>           |                 |             |                                |                 |               |                   |
| Fresh fruit                   | ukb-e-1309_EAS  | 2020        | 2,513                          | 8,255,183       | Pan-UKB team  | Pan-UKB           |
| Dried fruit                   | ukb-e-1319_EAS  | 2020        | 2,219                          | 8,275,593       | Pan-UKB team  | Pan-UKB           |
| <b>Vegetables intake</b>      |                 |             |                                |                 |               |                   |
| Raw vegetable                 | ukb-e-1299_EAS  | 2020        | 2,365                          | 8,268,823       | Pan-UKB team  | Pan-UKB           |
| Cooked vegetable              | ukb-e-1289_EAS  | 2020        | 2,499                          | 8,257,733       | Pan-UKB team  | Pan-UKB           |
| <b>Physical activity</b>      |                 |             |                                |                 |               |                   |
| Duration of vigorous activity | ukb-e-914_EAS   | 2020        | 1,373                          | 8,283,408       | Pan-UKB team  | Pan-UKB           |
| Duration of moderate activity | ukb-e-894_EAS   | 2020        | 1,853                          | 8,264,440       | Pan-UKB team  | Pan-UKB           |
| <b>Sexual behavior</b>        |                 |             |                                |                 |               |                   |
| Age of initiation             | ukb-e-2139_EAS  | 2020        | 1,711                          | 8,345,332       | Pan-UKB team  | Pan-UKB           |
| No. of sexual partner         | ukb-e-2149_EAS  | 2020        | 1,559                          | 8,326,030       | Pan-UKB team  | Pan-UKB           |

|                       |                |      |       |           |              |         |
|-----------------------|----------------|------|-------|-----------|--------------|---------|
| <b>Sleep behavior</b> |                |      |       |           |              |         |
| Insomnia              | ukb-e-1200_EAS | 2020 | 2,654 | 8,256,478 | Pan-UKB team | Pan-UKB |
| Nap during day        | ukb-e-1190_EAS | 2020 | 2,606 | 8,258,355 | Pan-UKB team | Pan-UKB |
| Daytime dozing        | ukb-e-1220_EAS | 2020 | 2,582 | 8,260,991 | Pan-UKB team | Pan-UKB |

**Table S3.** Univariable MR result based on IVW method in European discovery

| Factors                       | Effect size              |              | Heterogeneity |                  |                    | Pleiotropy         |       |
|-------------------------------|--------------------------|--------------|---------------|------------------|--------------------|--------------------|-------|
|                               | OR                       | P            | Q-stat        | P                | I <sup>2</sup> (%) | MR-Egger intercept | P     |
| <b>Tobacco smoking</b>        |                          |              |               |                  |                    |                    |       |
| Ever smoking                  | 1.05 (0.75, 1.48)        | 0.770        | 101.85        | <b>0.018</b>     | 27.35              | 0.00               | 0.666 |
| Smoking initiation            | 0.92 (0.82, 1.02)        | 0.118        | 173.33        | <b>&lt;0.001</b> | 51.54              | 0.01               | 0.373 |
| Lifetime smoking index        | <b>0.75 (0.58, 0.97)</b> | <b>0.026</b> | 245.41        | <b>&lt;0.001</b> | 57.62              | 0.01               | 0.135 |
| <b>Alcohol drinking</b>       |                          |              |               |                  |                    |                    |       |
| Alcohol frequency             | <b>0.89 (0.80, 0.99)</b> | <b>0.038</b> | 149.60        | <b>&lt;0.001</b> | 45.86              | 0.00               | 0.549 |
| Alcohol quantity              | 0.94 (0.60, 1.48)        | 0.787        | 161.06        | <b>&lt;0.001</b> | 80.13              | -0.01              | 0.460 |
| <b>Fruit intake</b>           |                          |              |               |                  |                    |                    |       |
| Fresh fruit                   | 1.25 (0.83, 1.88)        | 0.283        | 92.16         | <b>&lt;0.001</b> | 51.17              | 0.01               | 0.327 |
| Dried fruit                   | 1.15 (0.70, 1.89)        | 0.573        | 127.57        | <b>&lt;0.001</b> | 73.35              | 0.02               | 0.191 |
| <b>Vegetable intake</b>       |                          |              |               |                  |                    |                    |       |
| Raw vegetable                 | 2.15 (0.87, 5.31)        | 0.096        | 54.90         | <b>&lt;0.001</b> | 72.68              | -0.01              | 0.833 |
| Cooked vegetable              | 1.25 (0.61, 2.55)        | 0.536        | 38.52         | <b>&lt;0.001</b> | 63.65              | 0.05               | 0.265 |
| <b>Physical activity</b>      |                          |              |               |                  |                    |                    |       |
| Duration of vigorous activity | 1.04 (0.54, 1.99)        | 0.903        | 0.98          | 0.612            | 0                  | 0.04               | 0.508 |
| Duration of moderate activity | 1.24 (0.60, 2.57)        | 0.562        | 1.10          | 0.576            | 0                  | 0.02               | 0.595 |
| Duration of light activity    | 1.00 (1.00, 1.01)        | 0.468        | 1.78          | 0.411            | 0                  | 0.03               | 0.650 |
| <b>Sexual behavior</b>        |                          |              |               |                  |                    |                    |       |
| Age of initiation             | <b>1.18 (1.01, 1.38)</b> | <b>0.035</b> | 325.73        | <b>&lt;0.001</b> | 58.55              | <b>&lt;0.001</b>   | 0.954 |
| No. of sexual partners        | 0.90 (0.64, 1.26)        | 0.532        | 184.51        | <b>&lt;0.001</b> | 70.19              | -0.01              | 0.551 |
| <b>Sleep behavior</b>         |                          |              |               |                  |                    |                    |       |

|                |                   |       |        |                  |       |       |       |
|----------------|-------------------|-------|--------|------------------|-------|-------|-------|
| Insomnia       | 1.17 (0.80, 1.71) | 0.429 | 60.98  | <b>0.001</b>     | 47.53 | 0.01  | 0.244 |
| Nap during day | 0.97 (0.77, 1.24) | 0.825 | 125.90 | <b>0.011</b>     | 26.93 | 0.00  | 0.861 |
| Daytime dozing | 0.90 (0.44, 1.87) | 0.784 | 61.04  | <b>&lt;0.001</b> | 59.04 | -0.01 | 0.855 |

**Table S4.** Detection of outlying SNPs in European discovery by MR-PRESSO and radial regression

| Factors                | MR-PRESSO  |      |           |         | Radial regression |      |           |         |
|------------------------|------------|------|-----------|---------|-------------------|------|-----------|---------|
|                        | Outlier    | OR   | 95%CI     | P value | Outlier           | OR   | 95%CI     | P value |
| Tobacco smoking        |            |      |           |         |                   |      |           |         |
| Ever smoking           | rs56166763 | 1.11 | 0.81-1.53 | 0.524   | rs56166763        | 1.12 | 0.83-1.50 | 0.452   |
|                        | rs2516436  |      |           |         |                   |      |           |         |
| Smoking initiation     | rs13145728 | 0.94 | 0.85-1.04 | 0.237   | rs13145728        | 0.93 | 0.84-1.03 | 0.175   |
| Lifetime smoking index | rs6778080  | 0.77 | 0.61-0.97 | 0.029   | rs6778080         | 0.75 | 0.59-0.95 | 0.021   |
|                        | rs7077678  |      |           |         | rs7077678         |      |           |         |
| Alcohol drinking       |            |      |           |         |                   |      |           |         |
| Alcohol frequency      | rs8614     | 0.91 | 0.82-1.01 | 0.068   | N/A               |      |           |         |
| Alcohol quantity       | rs28929474 |      |           |         | rs28929474        |      |           |         |
|                        | rs4752999  | 0.95 | 0.72-1.25 | 0.711   | rs4752999         | 0.95 | 0.66-1.35 | 0.770   |
|                        | rs6739804  |      |           |         | rs6739804         |      |           |         |
| Fruit intake           |            |      |           |         |                   |      |           |         |
| Fresh fruit            | rs12044599 | 1.09 | 0.77-1.53 | 0.632   | rs12044599        | 1.13 | 0.79-1.62 | 0.517   |
| Dried fruit            | rs11811826 |      |           |         | rs11811826        |      |           |         |
|                        | rs4269101  | 1.45 | 1.04-2.03 | 0.038   | rs4269101         | 1.48 | 1.06-2.06 | 0.030   |
|                        | rs429358   |      |           |         | rs429358          |      |           |         |
|                        | rs62084586 |      |           |         | rs62084586        |      |           |         |
| Vegetable intake       |            |      |           |         |                   |      |           |         |
| Raw vegetable          | rs3095337  | 1.82 | 1.08-3.08 | 0.041   | rs3095337         | 1.48 | 0.87-2.52 | 0.171   |
|                        | rs3129962  |      |           |         | rs3129962         |      |           |         |
|                        |            |      |           |         | rs8130508         |      |           |         |

|                               |            |      |            |              |            |      |           |              |
|-------------------------------|------------|------|------------|--------------|------------|------|-----------|--------------|
|                               | rs8130508  |      |            |              |            |      |           |              |
|                               | rs9427220  |      |            |              |            |      |           |              |
| Cooked vegetable              | rs2844672  | 0.91 | 0.63-1.31  | 0.610        | rs2844672  | 0.91 | 0.62-1.31 | 0.611        |
| <b>Physical activity</b>      |            |      |            |              |            |      |           |              |
| Duration of vigorous activity | N/A        |      |            |              | N/A        |      |           |              |
| Duration of moderate activity | N/A        |      |            |              | N/A        |      |           |              |
| Duration of light activity    | N/A        |      |            |              | N/A        |      |           |              |
| <b>Sexual behavior</b>        |            |      |            |              |            |      |           |              |
| Age of initiation             | rs28929474 |      |            |              | rs28929474 |      |           |              |
|                               | rs62177795 | 1.15 | 11.03-1.28 | <b>0.015</b> | rs62177795 | 1.21 | 1.05-1.38 | <b>0.008</b> |
|                               | rs7618715  |      |            |              | rs7618715  |      |           |              |
|                               | rs809955   |      |            |              | rs807478   |      |           |              |
| No. of sexual partner         | rs2726461  | 0.92 | 0.70-1.21  | 0.551        | rs2726461  | 0.94 | 0.71-1.26 | 0.696        |
|                               | rs6908726  |      |            |              | rs6908726  |      |           |              |
| <b>Sleep behavior</b>         |            |      |            |              |            |      |           |              |
| Insomnia                      | N/A        |      |            |              | N/A        |      |           |              |
| Nap during day                | N/A        |      |            |              | N/A        |      |           |              |
| Daytime dozing                | rs553314   | 0.67 | 0.36-1.26  | 0.231        | rs553314   | 0.67 | 0.35-1.30 | 0.245        |
|                               | rs6923811  |      |            |              | rs6923811  |      |           |              |

**Table S5.** Univariable MR result based on IVW method in European replication

| Factors                       | Effect size               |              | Heterogeneity |                  |                    | Pleiotropy         |       |
|-------------------------------|---------------------------|--------------|---------------|------------------|--------------------|--------------------|-------|
|                               | OR                        | P            | Q-stat        | P                | I <sup>2</sup> (%) | MR-Egger intercept | P     |
| <b>Tobacco smoking</b>        |                           |              |               |                  |                    |                    |       |
| Ever smoking                  | 1.31 (0.61-2.79)          | 0.485        | 80.17         | 0.292            | 7.70               | -0.01              | 0.802 |
| Smoking initiation            | 0.90 (0.73, 1.12)         | 0.335        | 97.04         | 0.082            | 18.59              | -0.01              | 0.706 |
| Lifetime smoking index        | 1.08 (0.71, 1.63)         | 0.720        | 107.91        | 0.618            | 0.00               | 0.00               | 0.643 |
| <b>Alcohol drinking</b>       |                           |              |               |                  |                    |                    |       |
| Alcohol frequency             | 1.05 (0.82, 1.33)         | 0.704        | 128.08        | <b>0.006</b>     | 28.95              | 0.00               | 0.725 |
| Alcohol quantity              | 0.88 (0.39, 2.01)         | 0.765        | 69.33         | <b>&lt;0.001</b> | 56.73              | -0.03              | 0.172 |
| <b>Fruit intake</b>           |                           |              |               |                  |                    |                    |       |
| Fresh fruit                   | 2.32 (0.97, 5.52)         | 0.058        | 78.96         | <b>0.006</b>     | 36.68              | -0.02              | 0.185 |
| Dried fruit                   | 1.38 (0.67, 2.85)         | 0.378        | 51.63         | <b>0.044</b>     | 30.27              | 0.00               | 0.975 |
| <b>Vegetable intake</b>       |                           |              |               |                  |                    |                    |       |
| Raw vegetable                 | <b>5.44 (1.20, 24.70)</b> | <b>0.028</b> | 25.35         | 0.064            | 36.89              | 0.02               | 0.547 |
| Cooked vegetable              | 3.25 (0.64, 16.62)        | 0.157        | 36.62         | <b>0.001</b>     | 59.04              | -0.02              | 0.841 |
| <b>Physical activity</b>      |                           |              |               |                  |                    |                    |       |
| Duration of vigorous activity | 1.29 (0.25, 6.56)         | 0.762        | 0.03          | 0.984            | 0.00               | -0.02              | 0.888 |
| Duration of moderate activity | <b>0.11 (0.01, 0.88)</b>  | <b>0.037</b> | 1.45          | 0.484            | 0.00               | 0.02               | 0.849 |
| Duration of light activity    | 1.00 (0.99, 1.00)         | 0.295        | 1.06          | 0.590            | 0.00               | 0.10               | 0.492 |
| <b>Sexual behavior</b>        |                           |              |               |                  |                    |                    |       |
| Age of initiation             | 0.83 (0.63, 1.09)         | 0.187        | 169.82        | <b>0.034</b>     | 18.74              | 0.00               | 0.886 |
| No. of sexual partner         | 1.11 (0.66, 1.89)         | 0.691        | 69.01         | 0.097            | 20.30              | -0.02              | 0.223 |
| <b>Sleep behavior</b>         |                           |              |               |                  |                    |                    |       |

|                |                    |       |        |              |       |      |       |
|----------------|--------------------|-------|--------|--------------|-------|------|-------|
| Insomnia       | 0.97 (0.50, 1.86)  | 0.922 | 36.68  | 0.437        | 1.86  | 0.00 | 0.989 |
| Nap during day | 1.44 (0.81, 2.57)  | 0.215 | 117.01 | <b>0.035</b> | 22.23 | 0.00 | 0.809 |
| Daytime dozing | 2.24 (0.55, 9.09 ) | 0.257 | 38.97  | 0.064        | 30.72 | 0.04 | 0.217 |

**Table S6.** Univariable MR result based on IVW method in East Asian discovery

| Factors                       | Effect size              |              | Heterogeneity |              |                    | Pleiotropy         |       |
|-------------------------------|--------------------------|--------------|---------------|--------------|--------------------|--------------------|-------|
|                               | OR                       | P            | Q-stat        | P            | I <sup>2</sup> (%) | MR-Egger intercept | P     |
| <b>Tobacco smoking</b>        |                          |              |               |              |                    |                    |       |
| Ever smoking                  | 1.05 (0.94, 1.17)        | 0.395        | 9.41          | 0.400        | 4.33               | -0.04              | 0.742 |
| <b>Alcohol drinking</b>       |                          |              |               |              |                    |                    |       |
| Alcohol frequency             | <b>1.11 (1.00, 1.23)</b> | <b>0.050</b> | 1.80          | 0.773        | 0.00               | -0.01              | 0.887 |
| <b>Fruit intake</b>           |                          |              |               |              |                    |                    |       |
| Fresh fruit                   | 1.01 (0.73, 1.39)        | 0.971        | 5.96          | 0.311        | 16.05              | -0.07              | 0.316 |
| Dried fruit                   | 1.06 (0.84, 1.34)        | 0.635        | 16.52         | 0.086        | 39.46              | -0.04              | 0.672 |
| <b>Vegetable intake</b>       |                          |              |               |              |                    |                    |       |
| Raw vegetable                 | 0.89 (0.68, 1.17)        | 0.416        | 0.64          | 0.727        | 0.00               | -0.04              | 0.730 |
| Cooked vegetable              | 1.04 (0.88, 1.23)        | 0.627        | 31.60         | <b>0.017</b> | 46.20              | -0.01              | 0.800 |
| <b>Physical activity</b>      |                          |              |               |              |                    |                    |       |
| Duration of vigorous activity | 0.93 (0.82, 1.06)        | 0.259        | 3.68          | 0.298        | 18.6               | 0.09               | 0.219 |
| Duration of moderate activity | 1.04 (0.88, 1.22)        | 0.801        | 0.12          | 0.944        | 0.00               | 0.02               | 0.835 |
| <b>Sexual behavior</b>        |                          |              |               |              |                    |                    |       |
| Age of initiation             | 0.93 (0.73, 1.19)        | 0.586        | 3.37          | 0.339        | 10.86              | 1.01               | 0.240 |
| No. of sexual partners        | 0.84 (0.59, 1.21)        | 0.353        | 0.85          | 0.932        | 0.00               | 0.08               | 0.609 |
| <b>Sleep behavior</b>         |                          |              |               |              |                    |                    |       |
| Insomnia                      | 0.86 (0.69, 1.07)        | 0.164        | 28.18         | <b>0.043</b> | 39.68              | 0.01               | 0.777 |
| Nap during day                | 1.12 (0.98, 1.28)        | 0.104        | 8.85          | 0.784        | 0.00               | -0.01              | 0.947 |
| Daytime dozing                | 0.90 (0.66, 1.24)        | 0.535        | 12.13         | 0.595        | 0.00               | 0.03               | 0.520 |

**Table S7.** Univariable MR result based on IVW method in East Asian replication

| Factors                       | Effect size       |       | Heterogeneity |                  |                    | Pleiotropy         |       |
|-------------------------------|-------------------|-------|---------------|------------------|--------------------|--------------------|-------|
|                               | OR                | P     | Q-stat        | P                | I <sup>2</sup> (%) | MR-Egger intercept | P     |
| <b>Tobacco smoking</b>        |                   |       |               |                  |                    |                    |       |
| Ever smoking                  | 0.99 (0.93, 1.06) | 0.795 | 2.67          | 0.849            | 0.00               | -0.06              | 0.436 |
| <b>Alcohol drinking</b>       |                   |       |               |                  |                    |                    |       |
| Alcohol frequency             | 1.00 (0.94, 1.06) | 0.887 | 0.19          | 0.979            | 0.00               | -0.02              | 0.769 |
| <b>Fruit intake</b>           |                   |       |               |                  |                    |                    |       |
| Fresh fruit                   | 0.98 (0.84, 1.14) | 0.797 | 2.70          | 0.609            | 0.00               | 0.01               | 0.713 |
| Dried fruit                   | 0.96 (0.80, 1.16) | 0.666 | 26.20         | <b>&lt;0.001</b> | 69.46              | 0.02               | 0.817 |
| <b>Vegetable intake</b>       |                   |       |               |                  |                    |                    |       |
| Raw vegetable                 | 1.08 (0.94, 1.24) | 0.309 | <0.01         | 1.000            | 0.00               | 0.00               | 0.993 |
| Cooked vegetable              | 0.97 (0.91, 1.04) | 0.386 | 13.22         | 0.721            | 0.00               | 0.03               | 0.248 |
| <b>Physical activity</b>      |                   |       |               |                  |                    |                    |       |
| Duration of vigorous activity | 0.96 (0.89, 1.03) | 0.275 | 2.50          | 0.475            | 0.00               | -0.01              | 0.876 |
| Duration of moderate activity | 0.96 (0.86, 1.08) | 0.498 | 0.93          | 0.628            | 0.00               | -0.04              | 0.516 |
| <b>Sexual behavior</b>        |                   |       |               |                  |                    |                    |       |
| Age of initiation             | 0.97 (0.84, 1.12) | 0.669 | 4.45          | 0.216            | 32.65              | -0.51              | 0.242 |
| No. of sexual partner         | 1.05 (0.86, 1.27) | 0.637 | 5.09          | 0.278            | 21.48              | 0.03               | 0.761 |
| <b>Sleep behavior</b>         |                   |       |               |                  |                    |                    |       |
| Insomnia                      | 0.97 (0.88, 1.08) | 0.589 | 10.99         | 0.687            | 0.00               | -0.03              | 0.270 |
| Nap during day                | 0.98 (0.89, 1.08) | 0.669 | 17.05         | 0.148            | 29.60              | -0.01              | 0.812 |
| Daytime dozing                | 0.99 (0.85, 1.16) | 0.929 | 25.63         | <b>0.042</b>     | 41.48              | 0.00               | 0.926 |



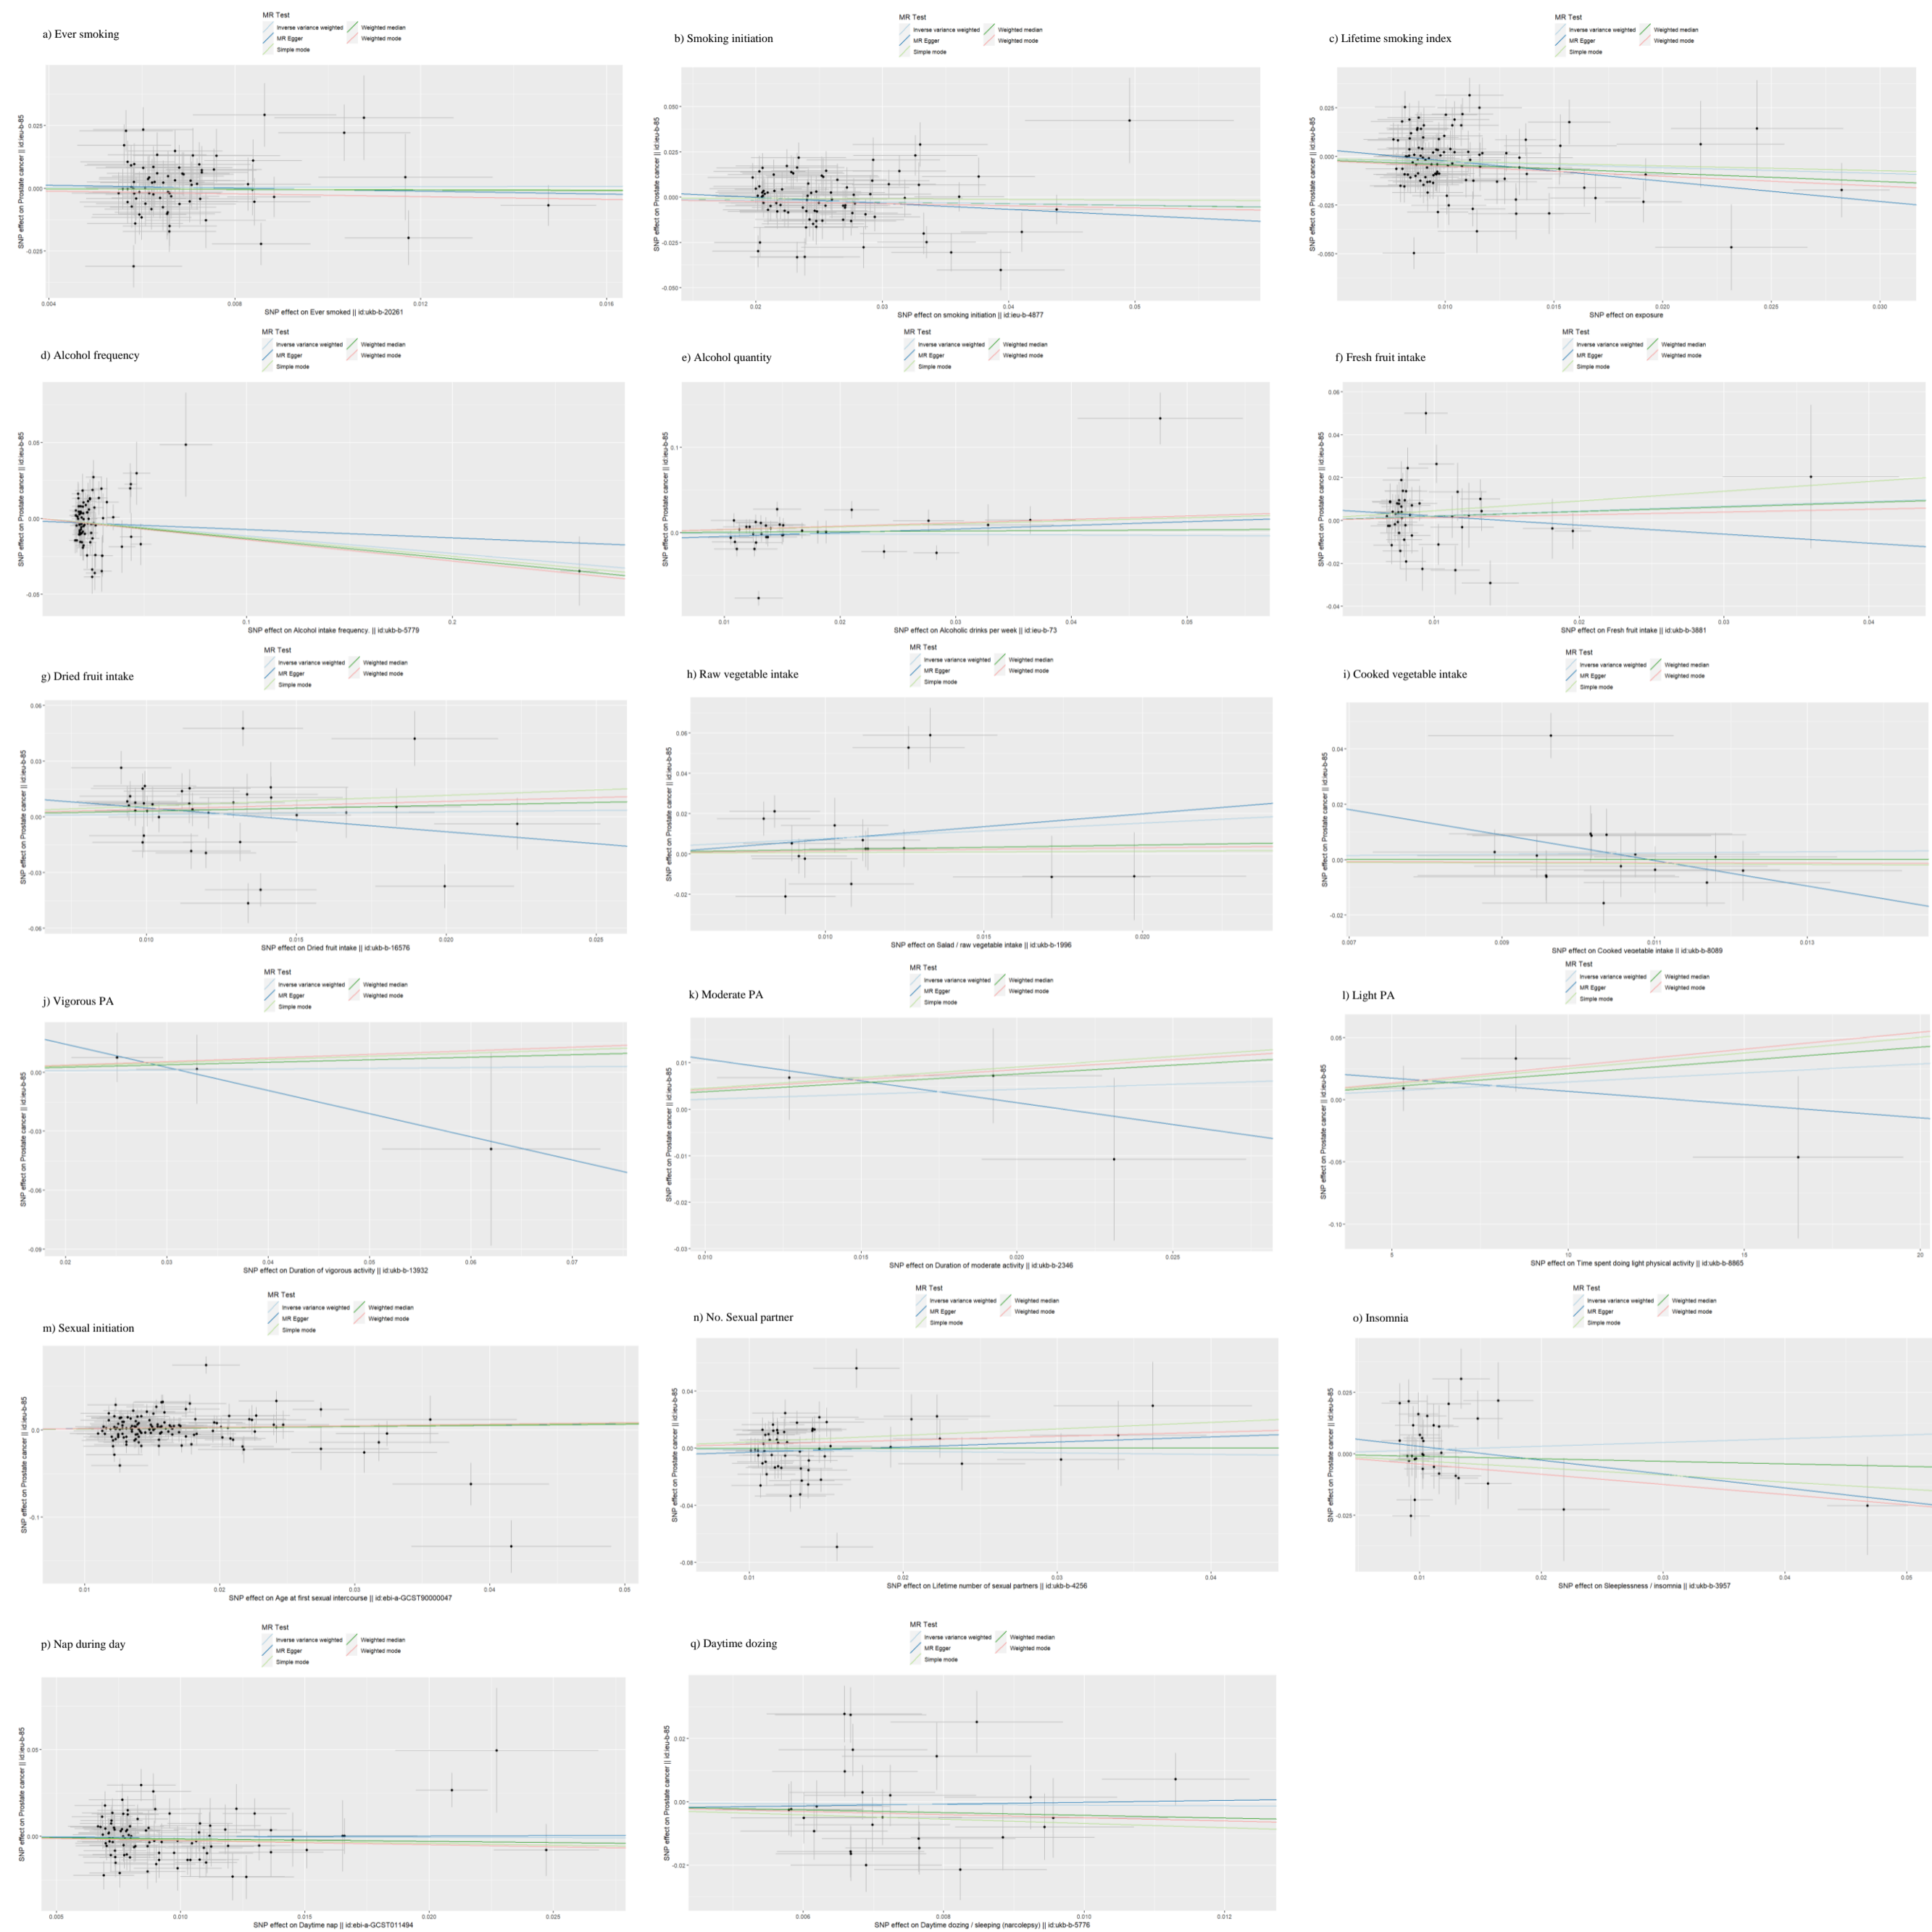

**Figure S2.** Scatter plots of the 15 behavioral factors in relation to PCa in the European discovery sample

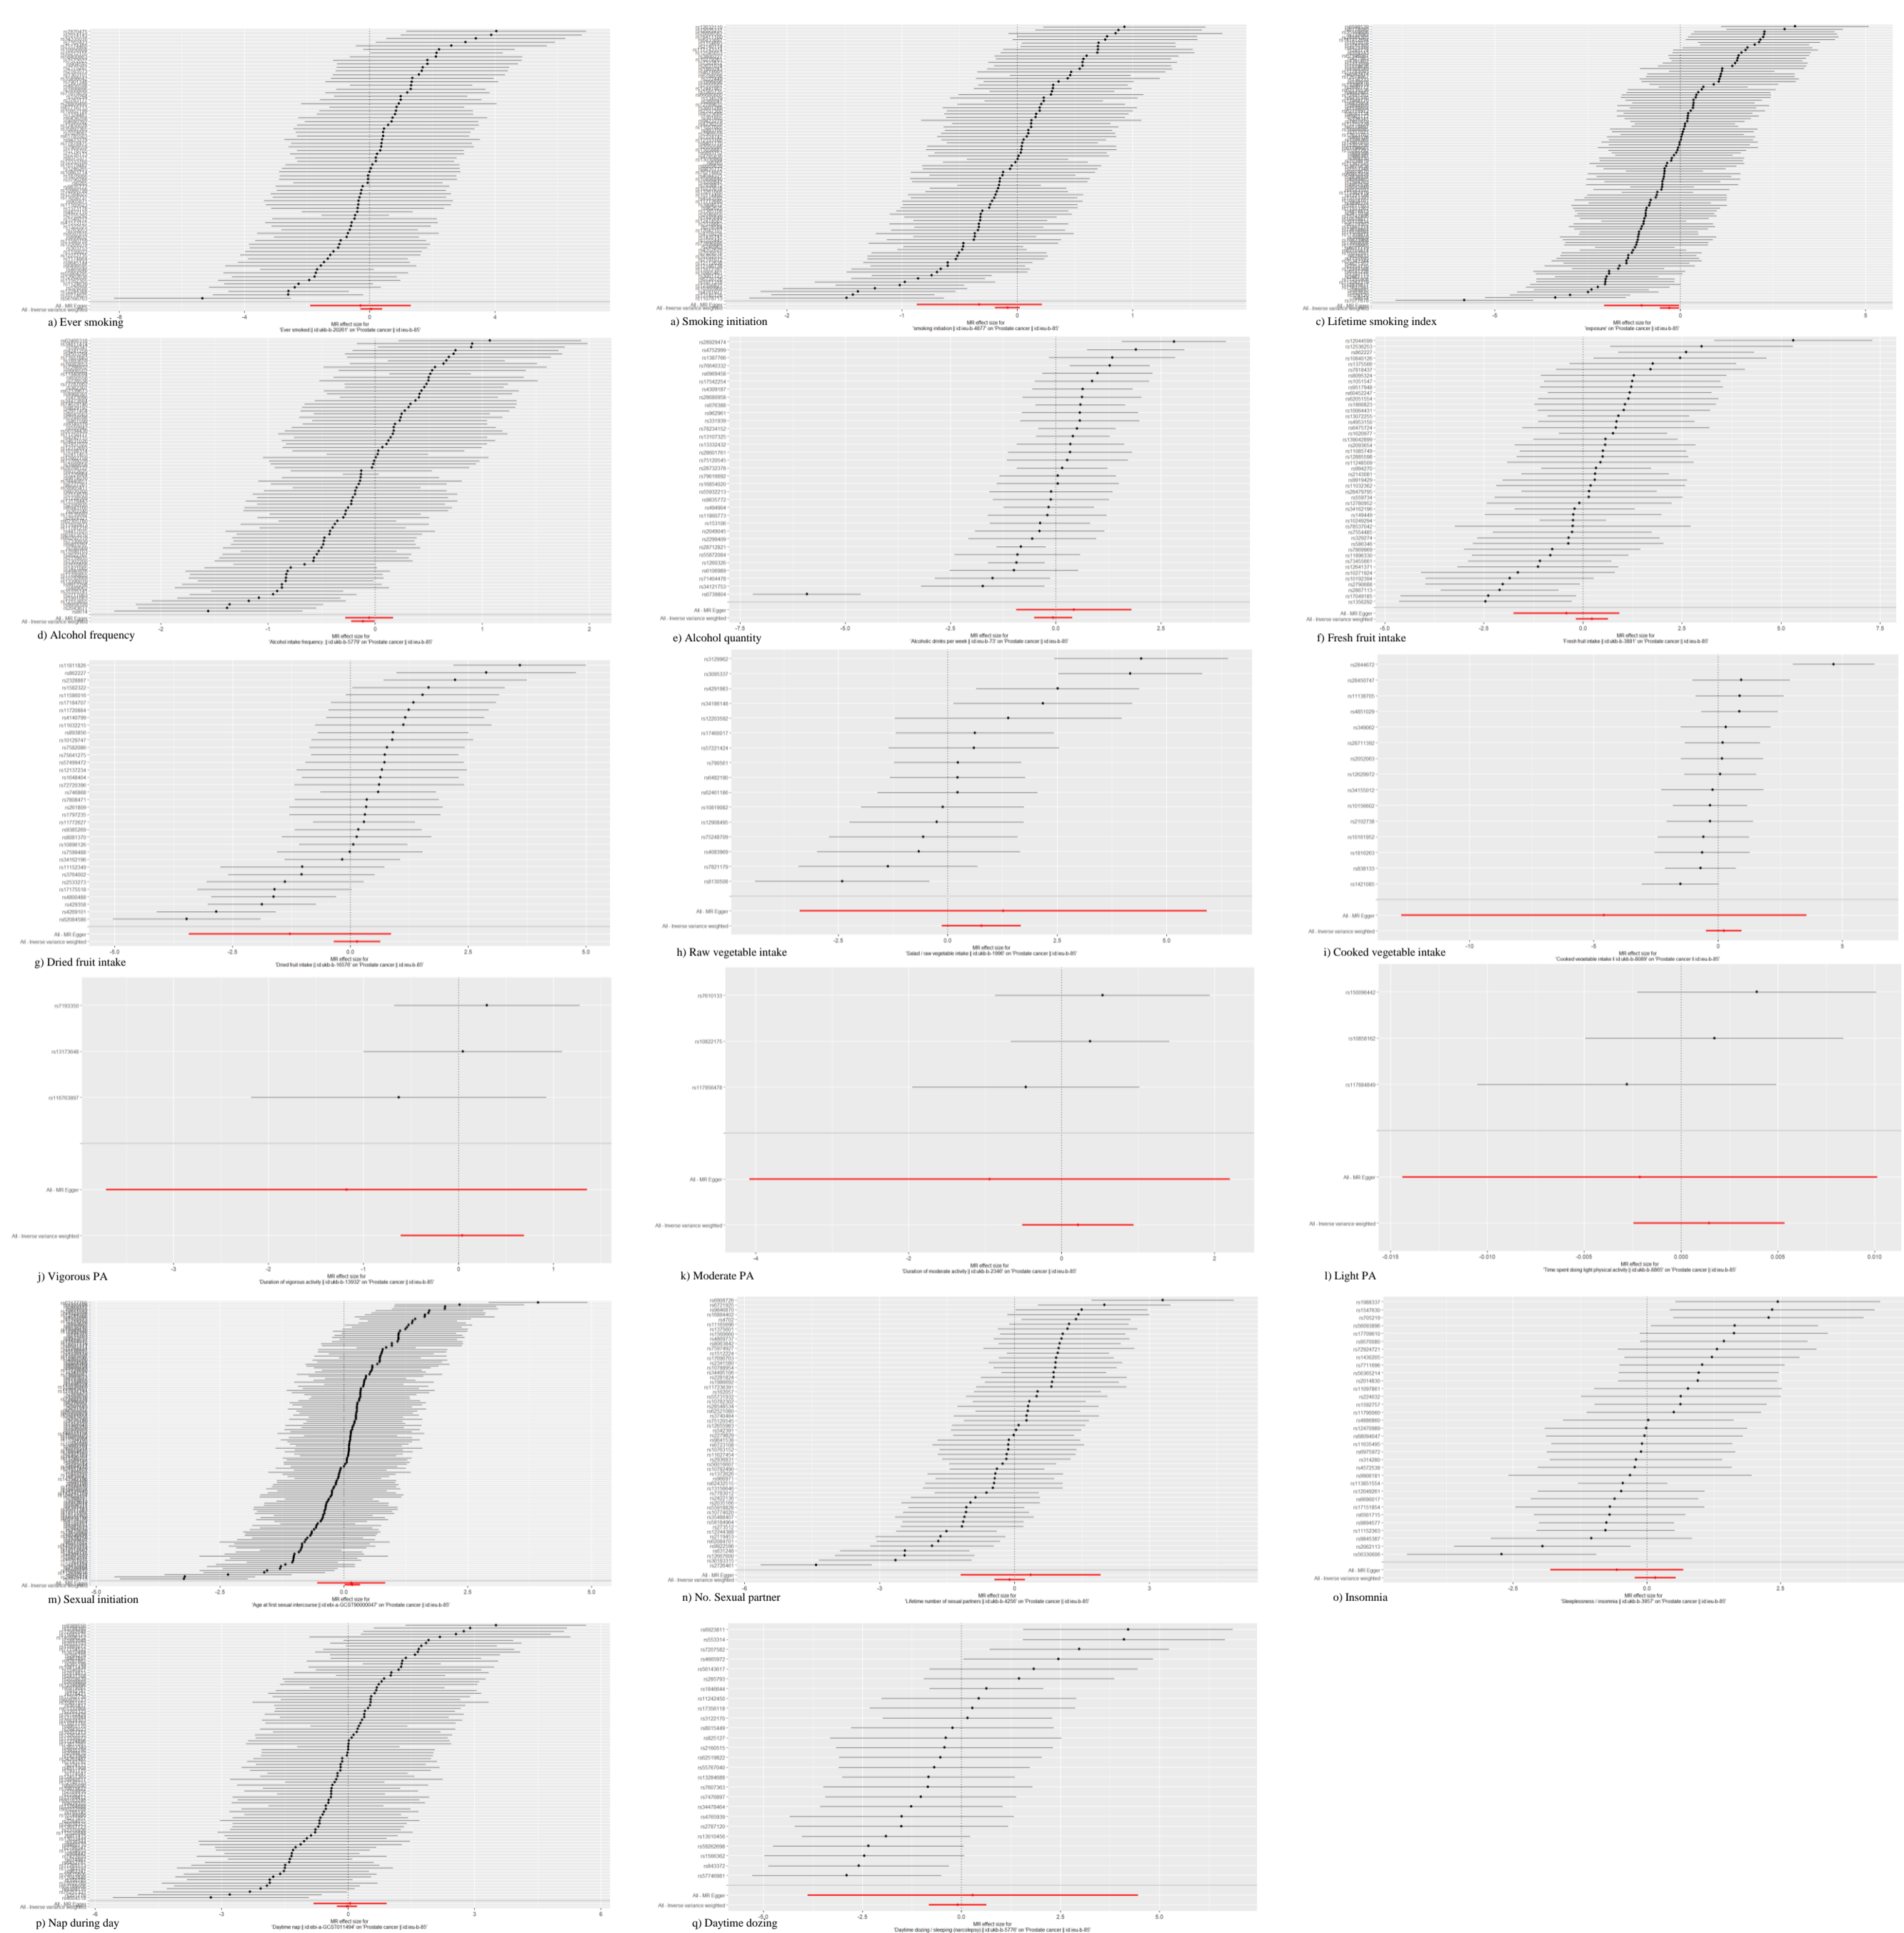

**Figure S3.** Forest plots of each single SNP of the 15 behavioral factors in relation to PCa in the European discovery sample

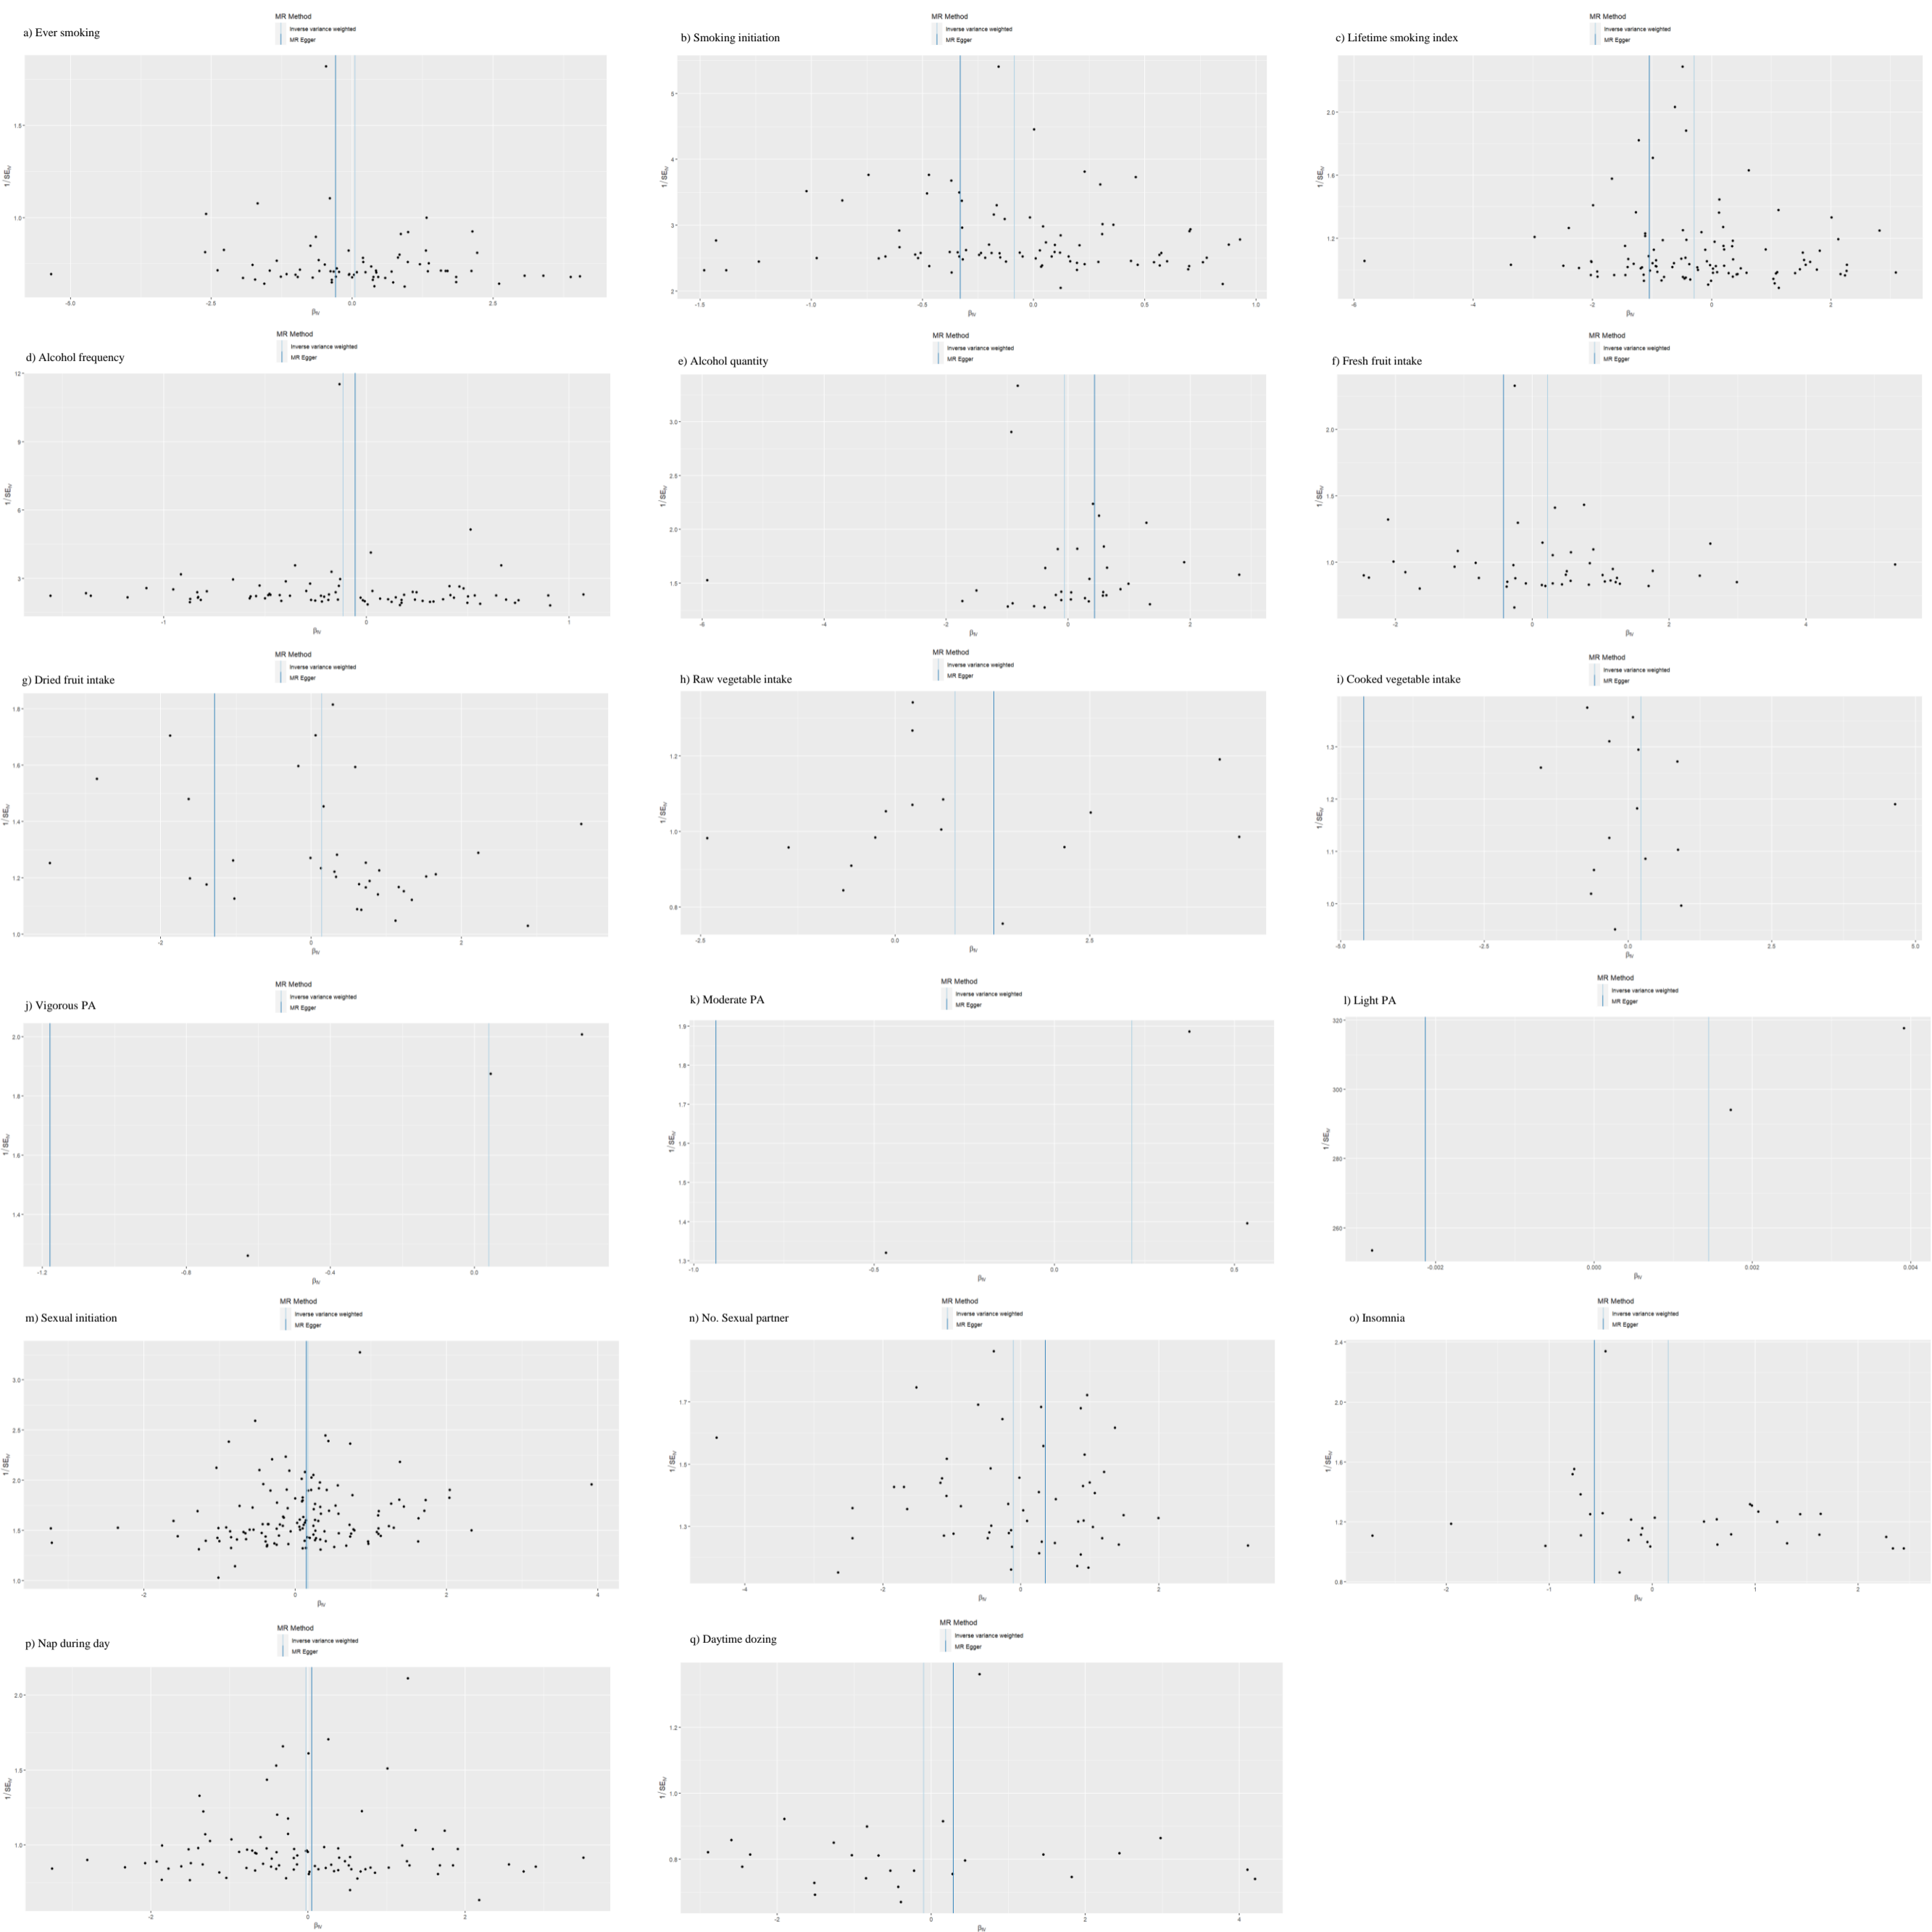

**Figure S4.** Funnel plots of each single SNP of the 15 behavioral factors in relation to PCa in the European discovery sample

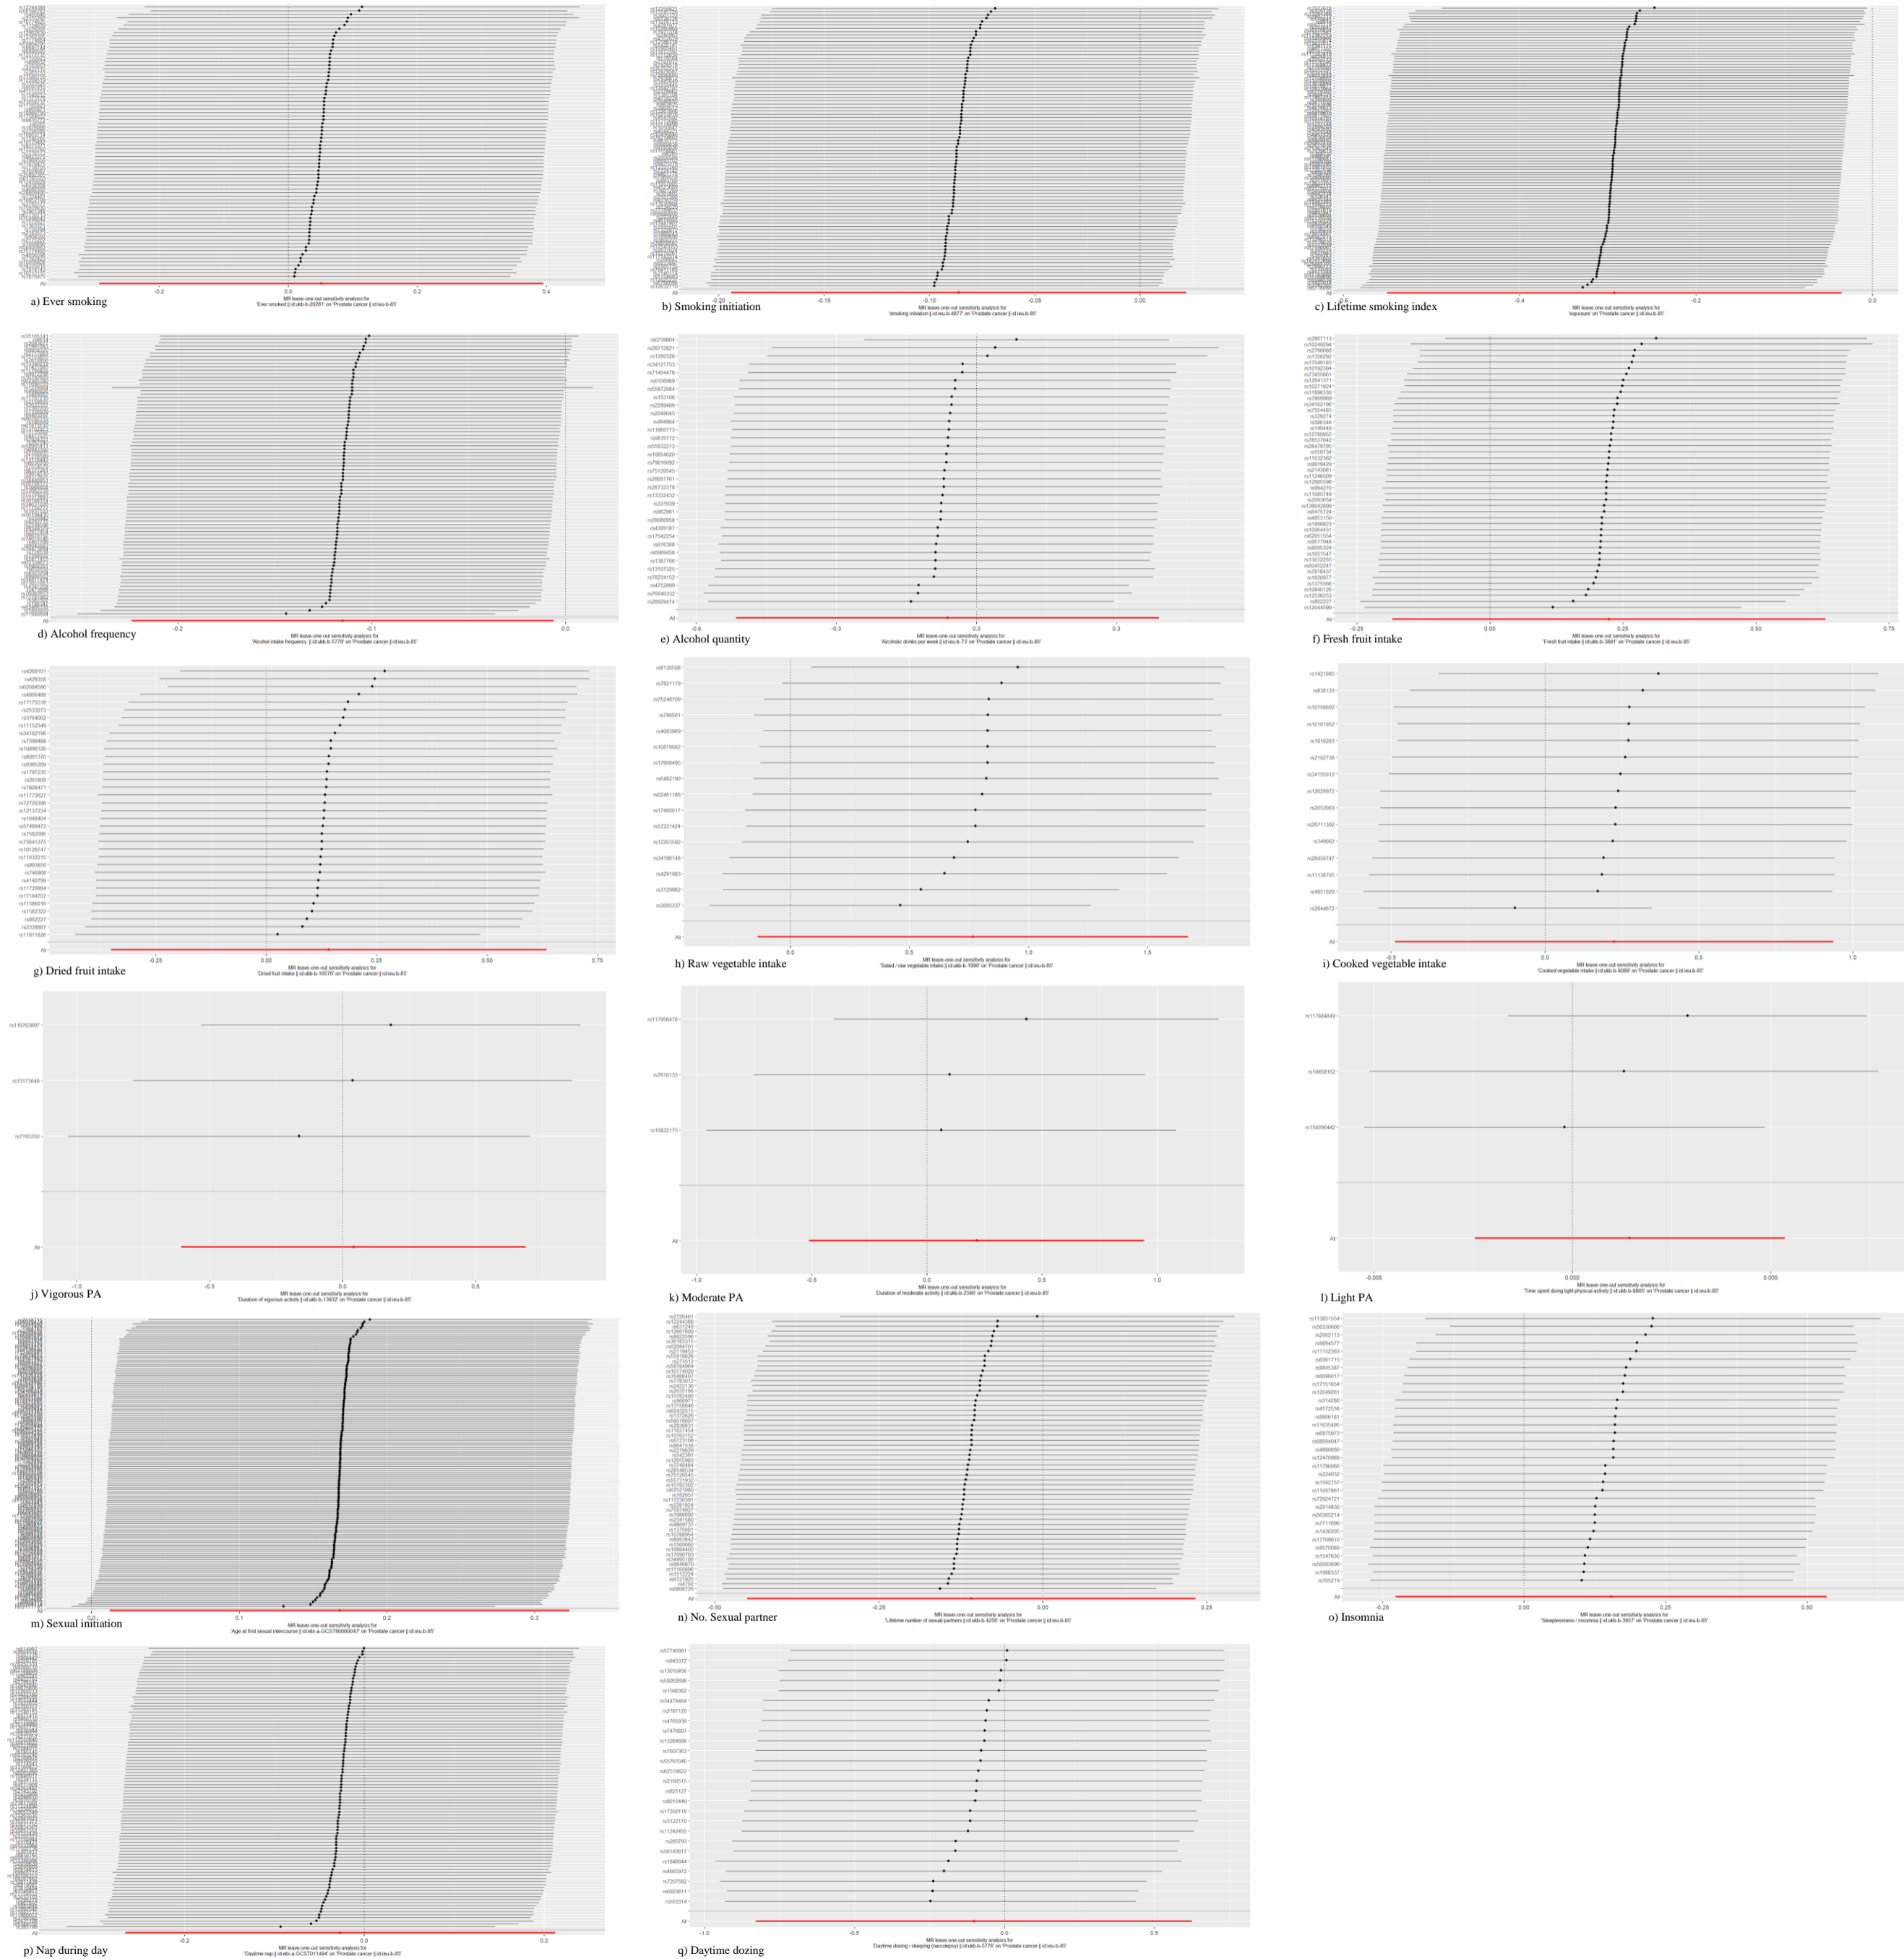

**Figure S5.** Leave-one-out analyses of the 15 behavioral factors in relation to PCa in the European discovery sample

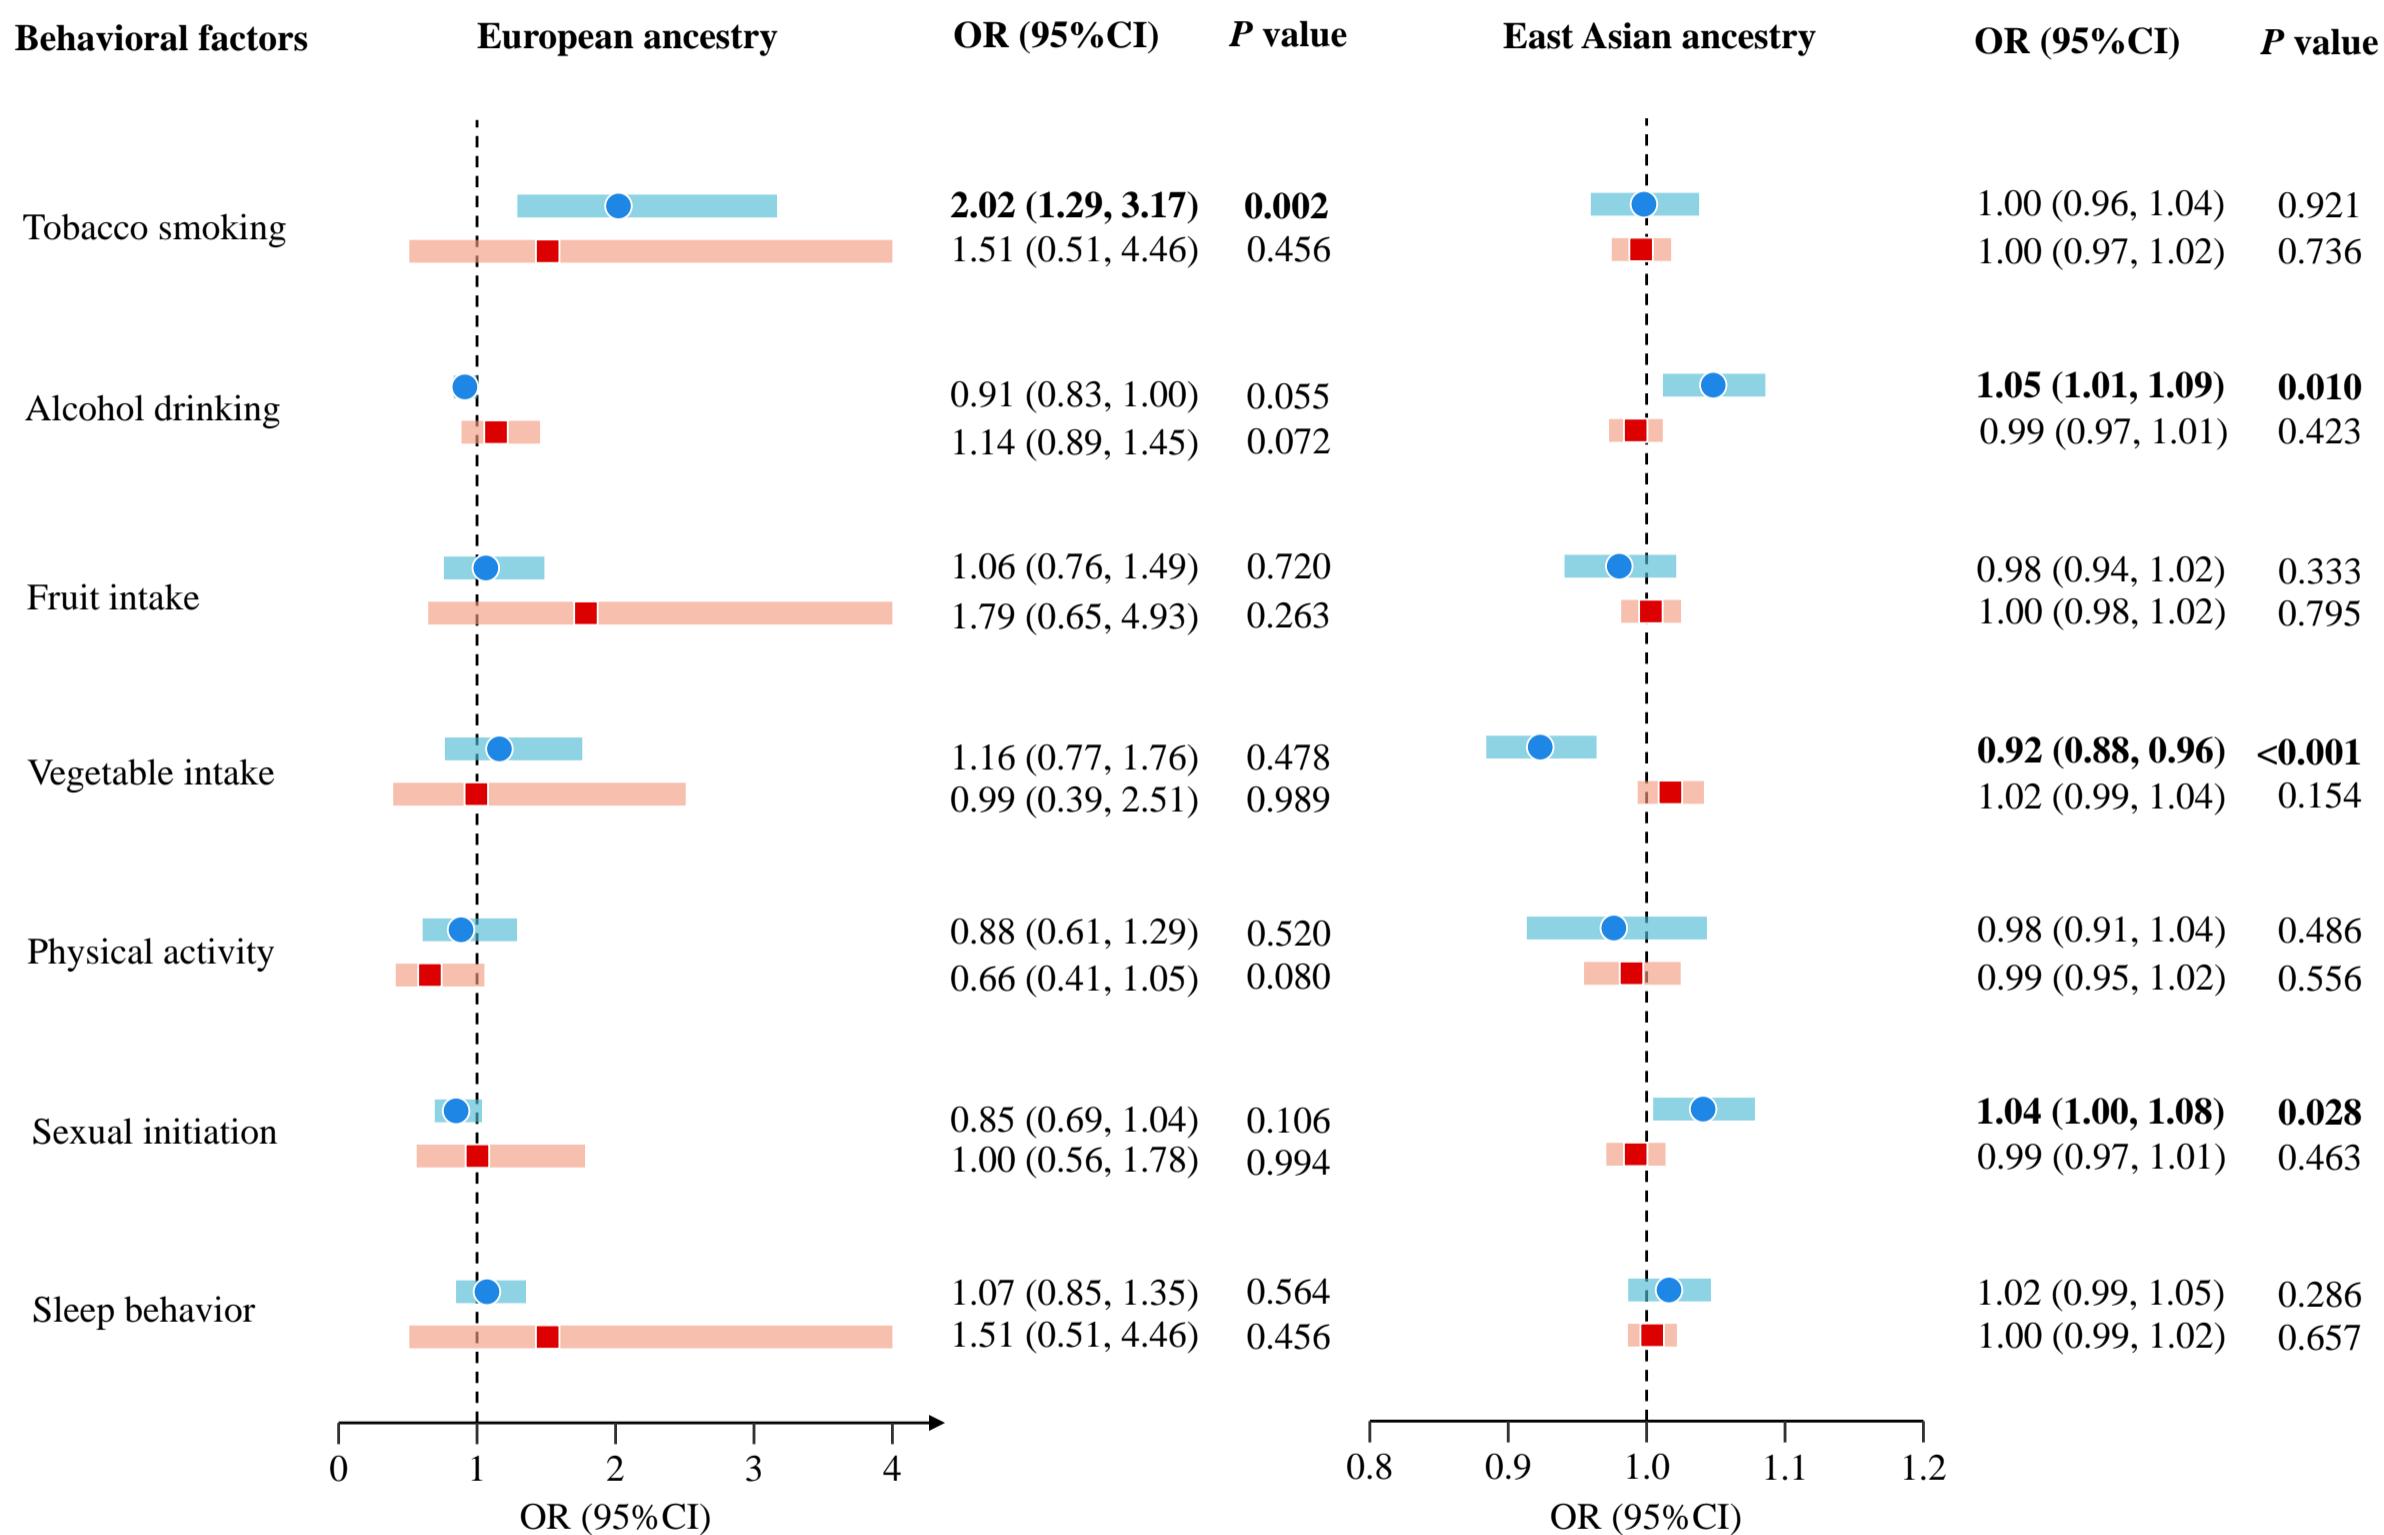

**Figure S6.** Causal effects of modifiable behavioral factors on prostate cancer by MVMR-LASSO in Europeans and East Asians

Discovery Replication

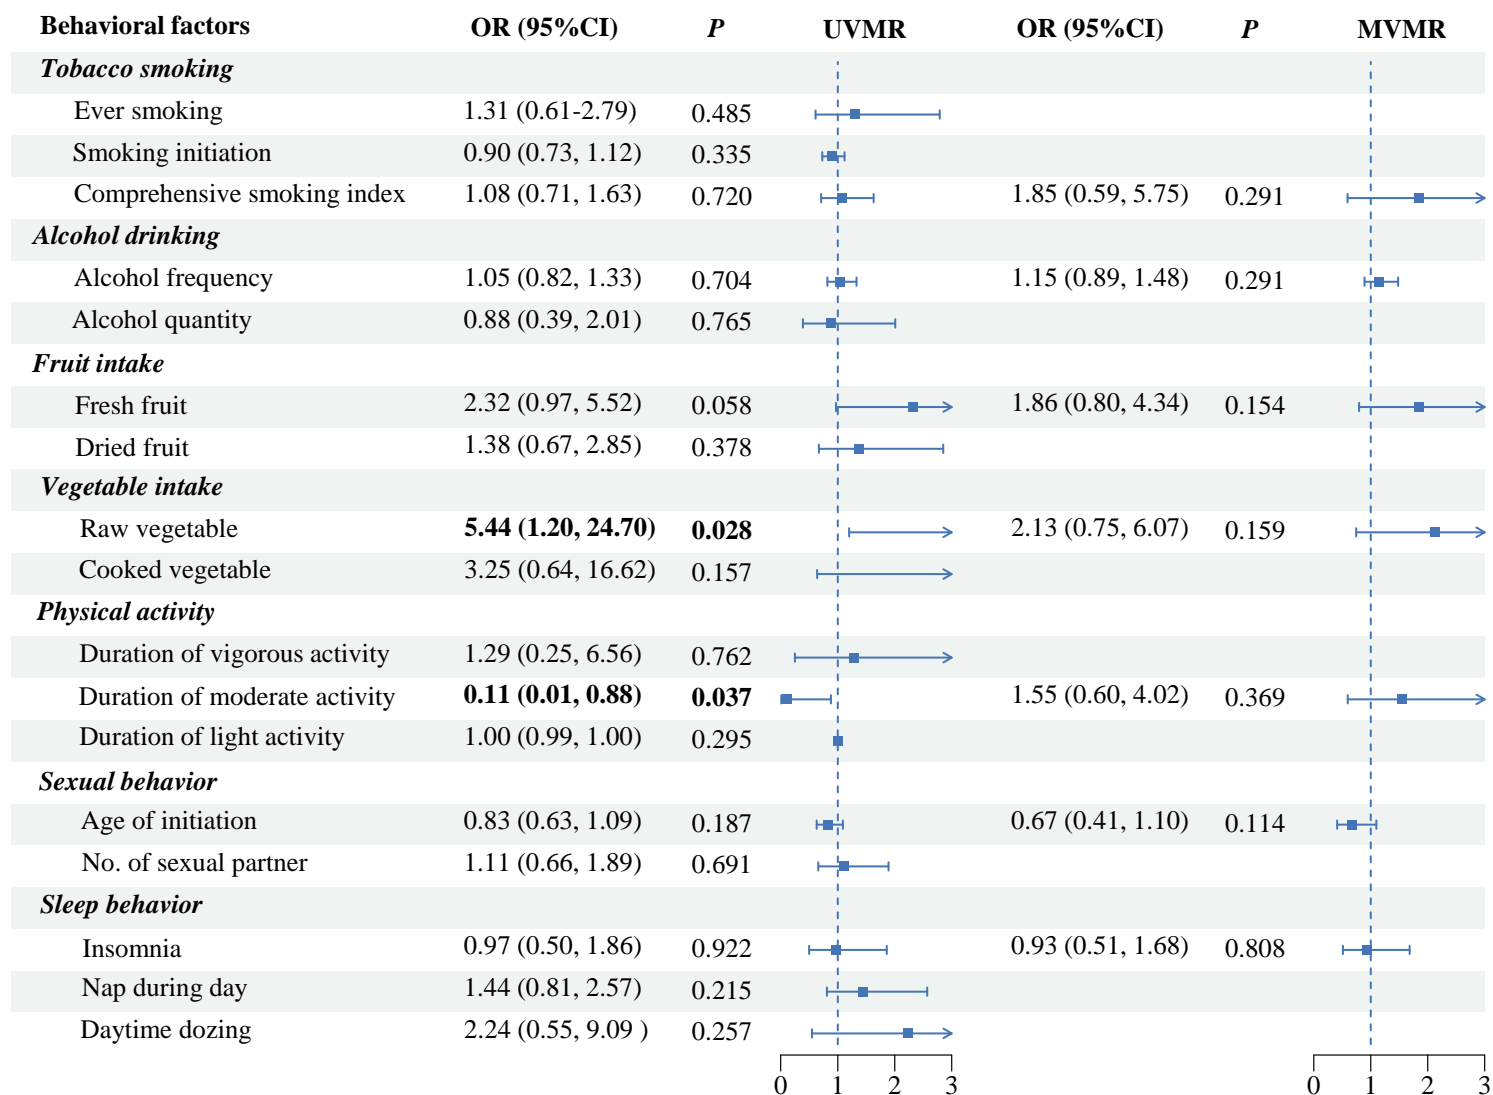

**Figure S7.** Causal effects of modifiable behaviors on prostate cancer by UVMR and MVMR in European replication sample

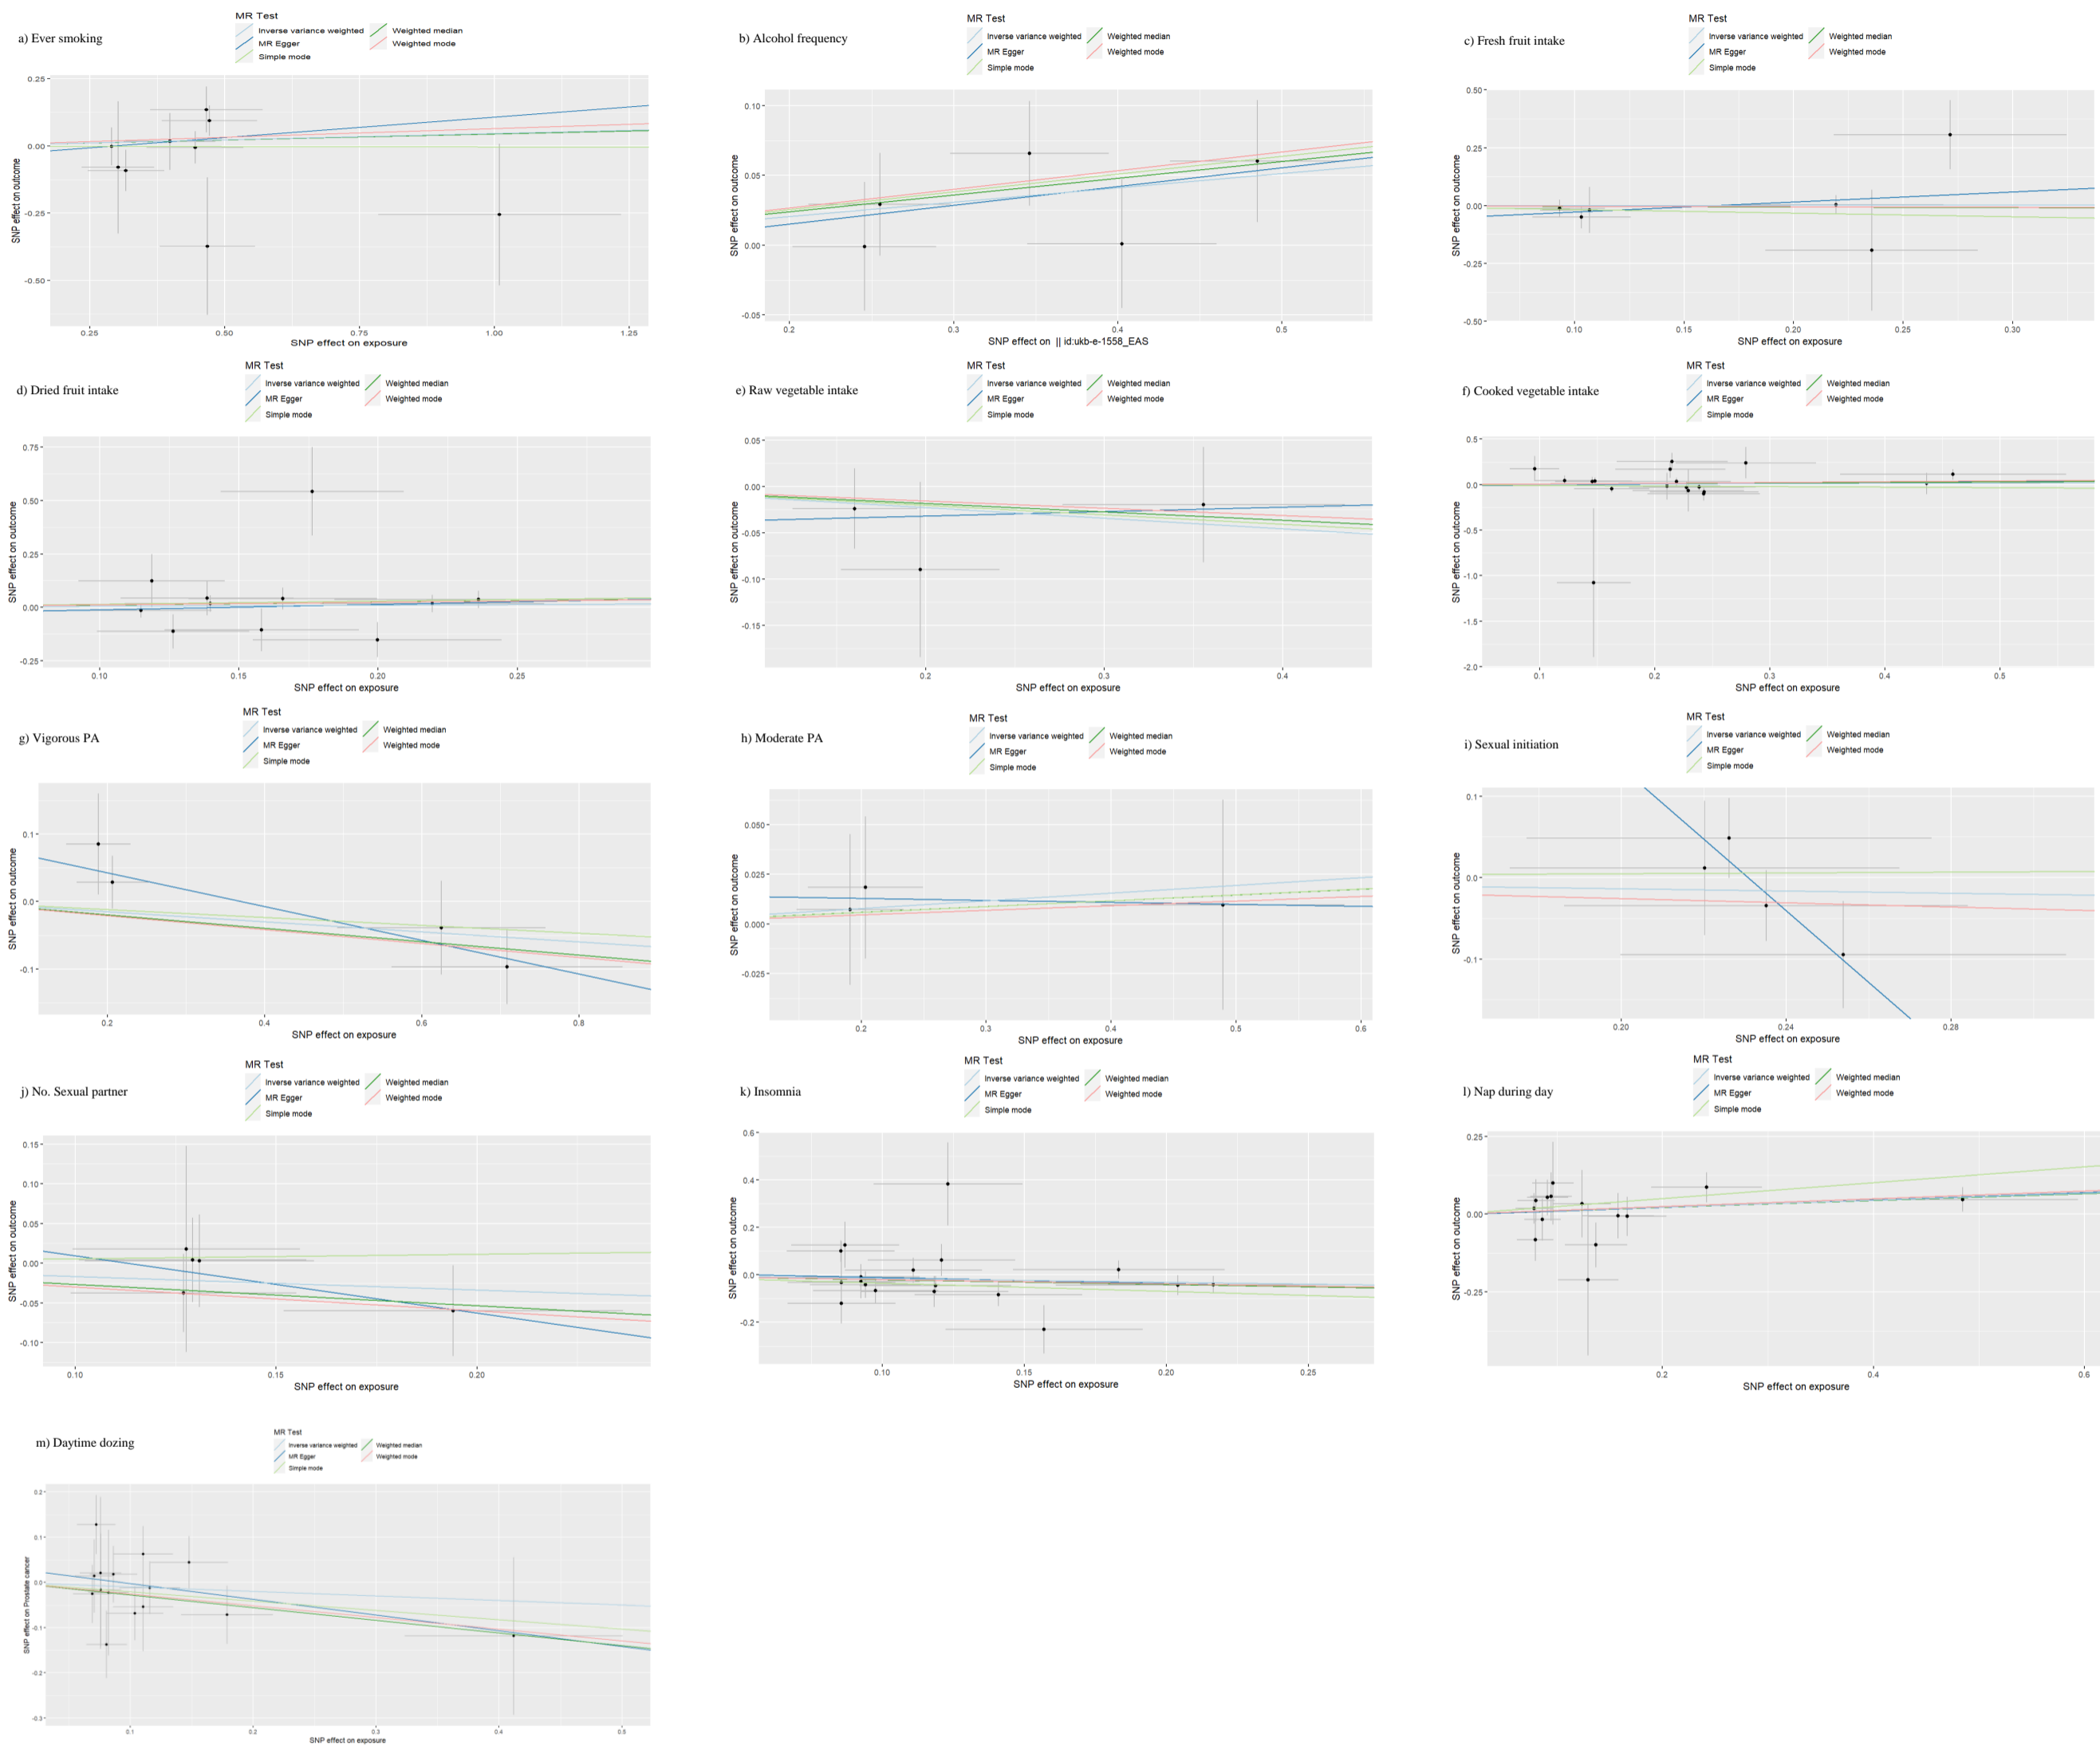

**Figure S8.** Scatter plots of the 12 behavioral factors in relation to PCa in the East Asian discovery sample

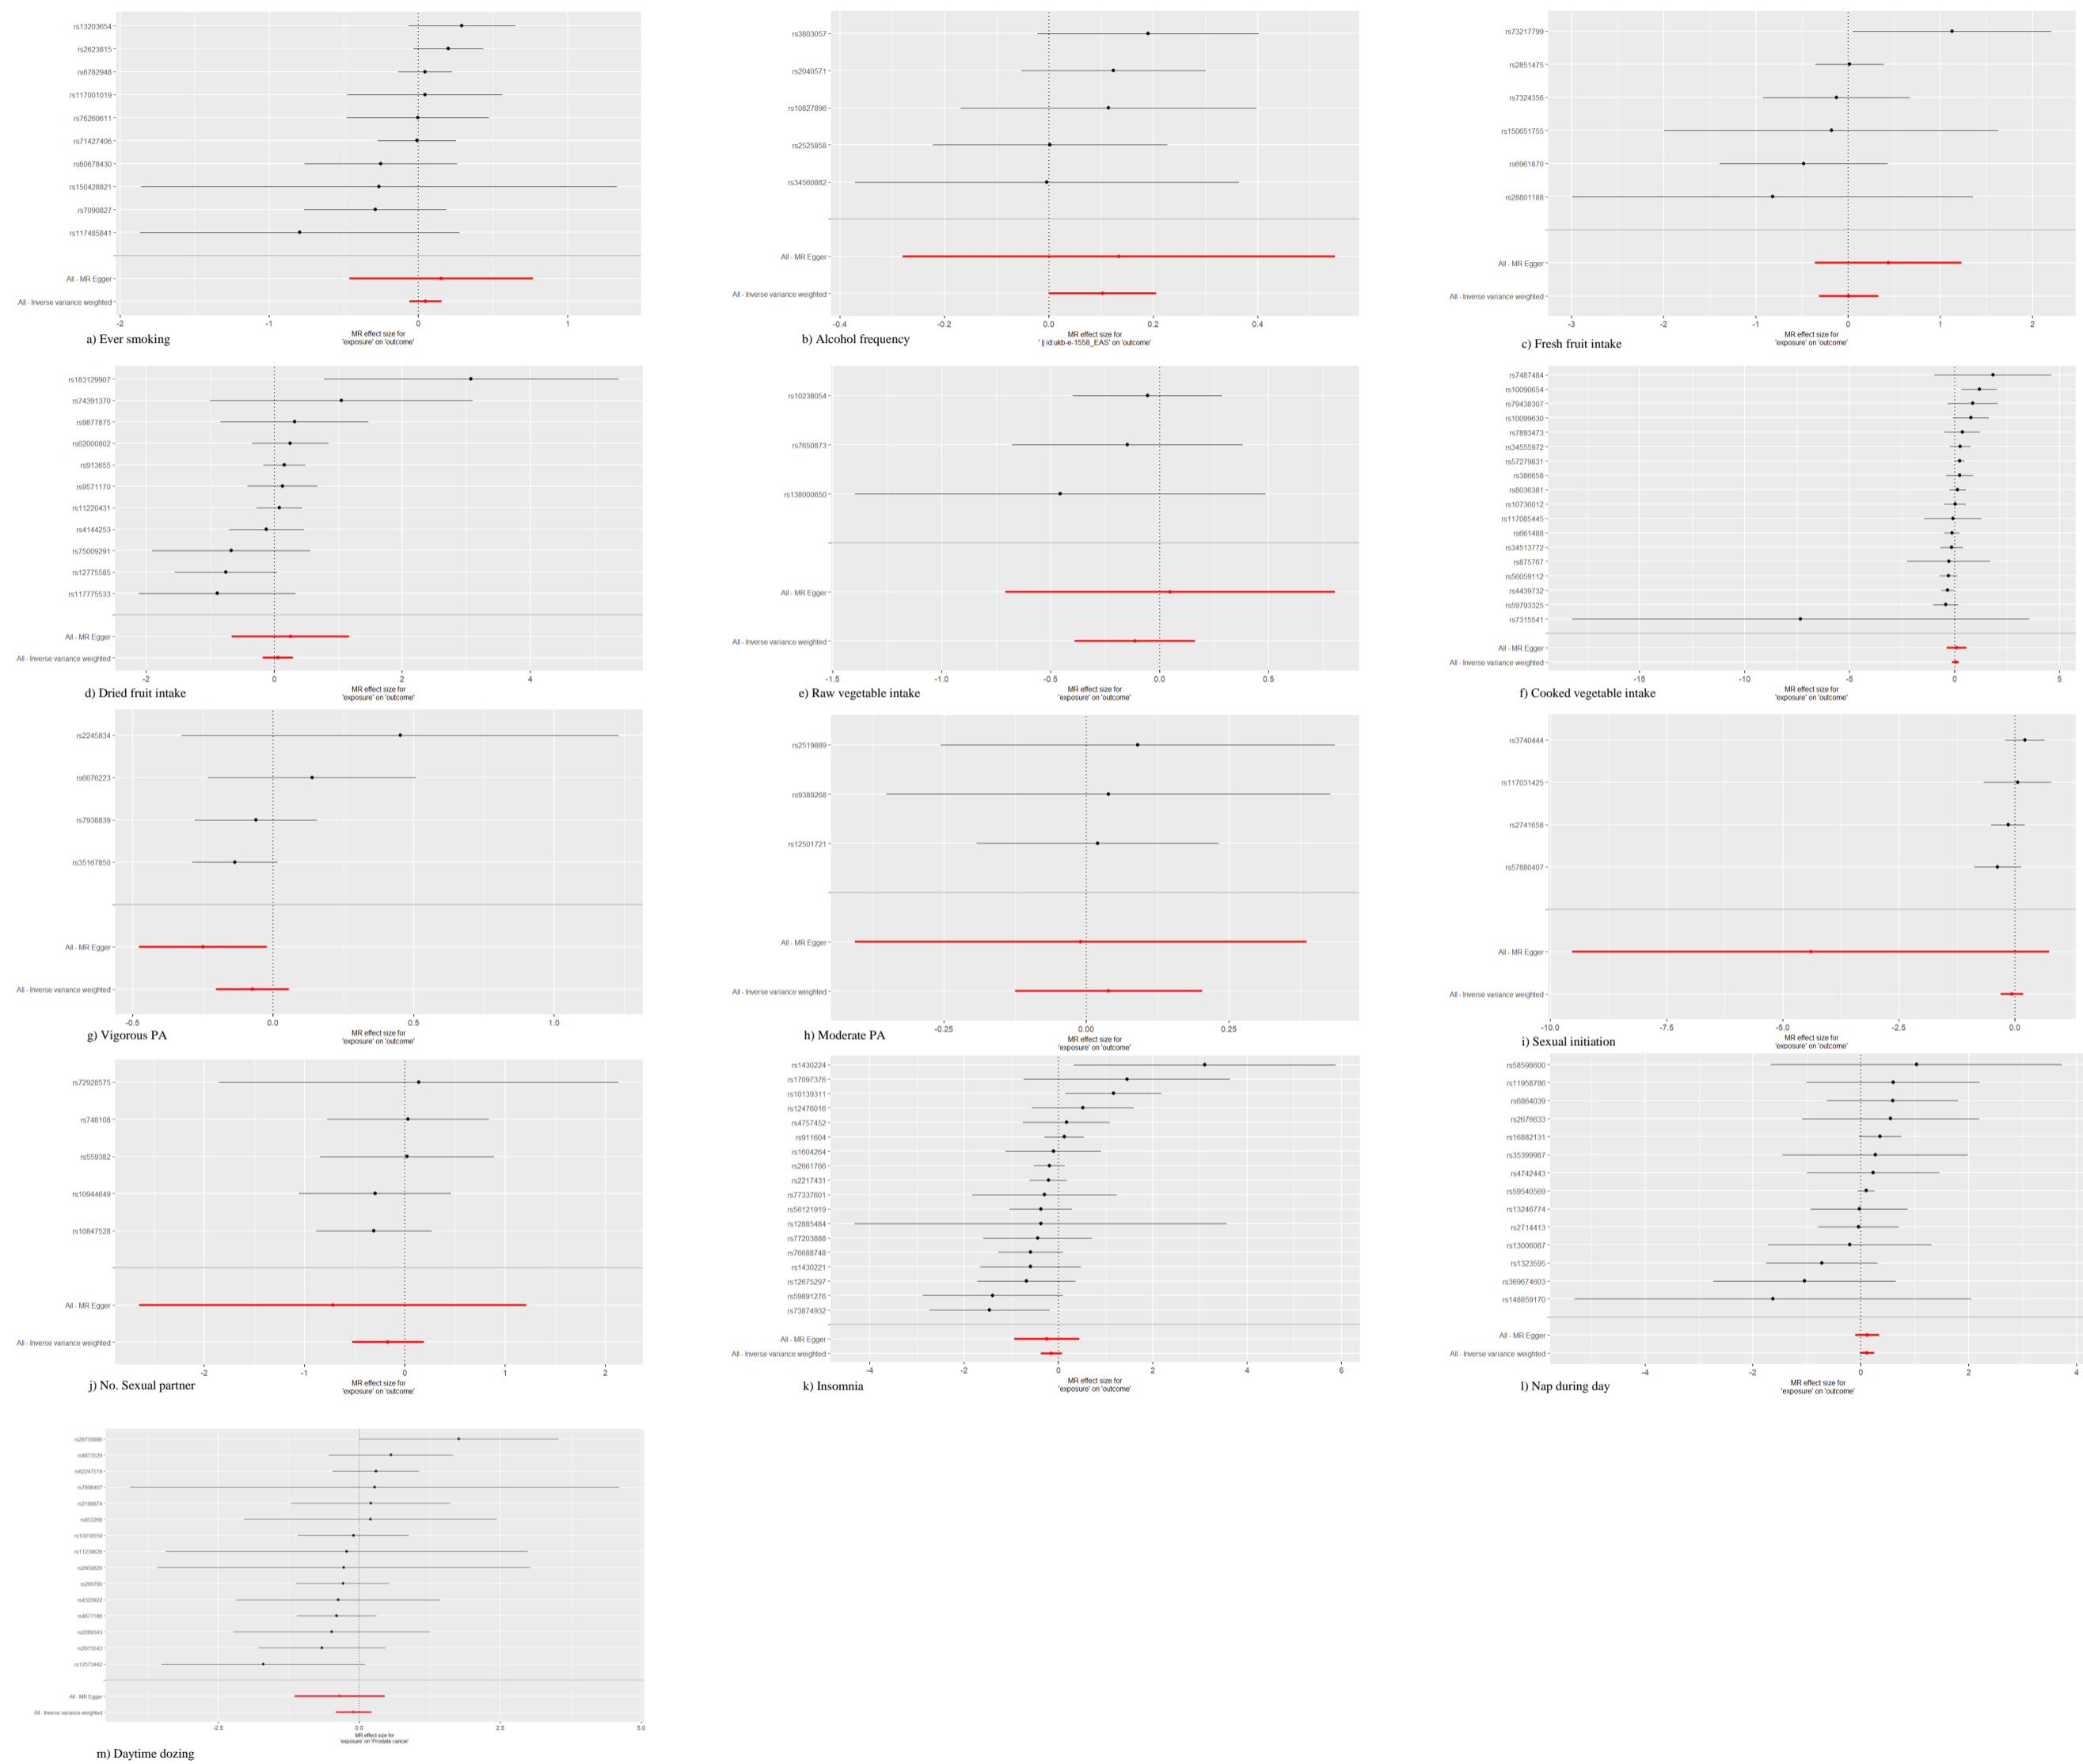

**Figure S9.** Forest plots of each single SNP of the 12 behavioral factors in relation to PCa in the East Asian discovery sample

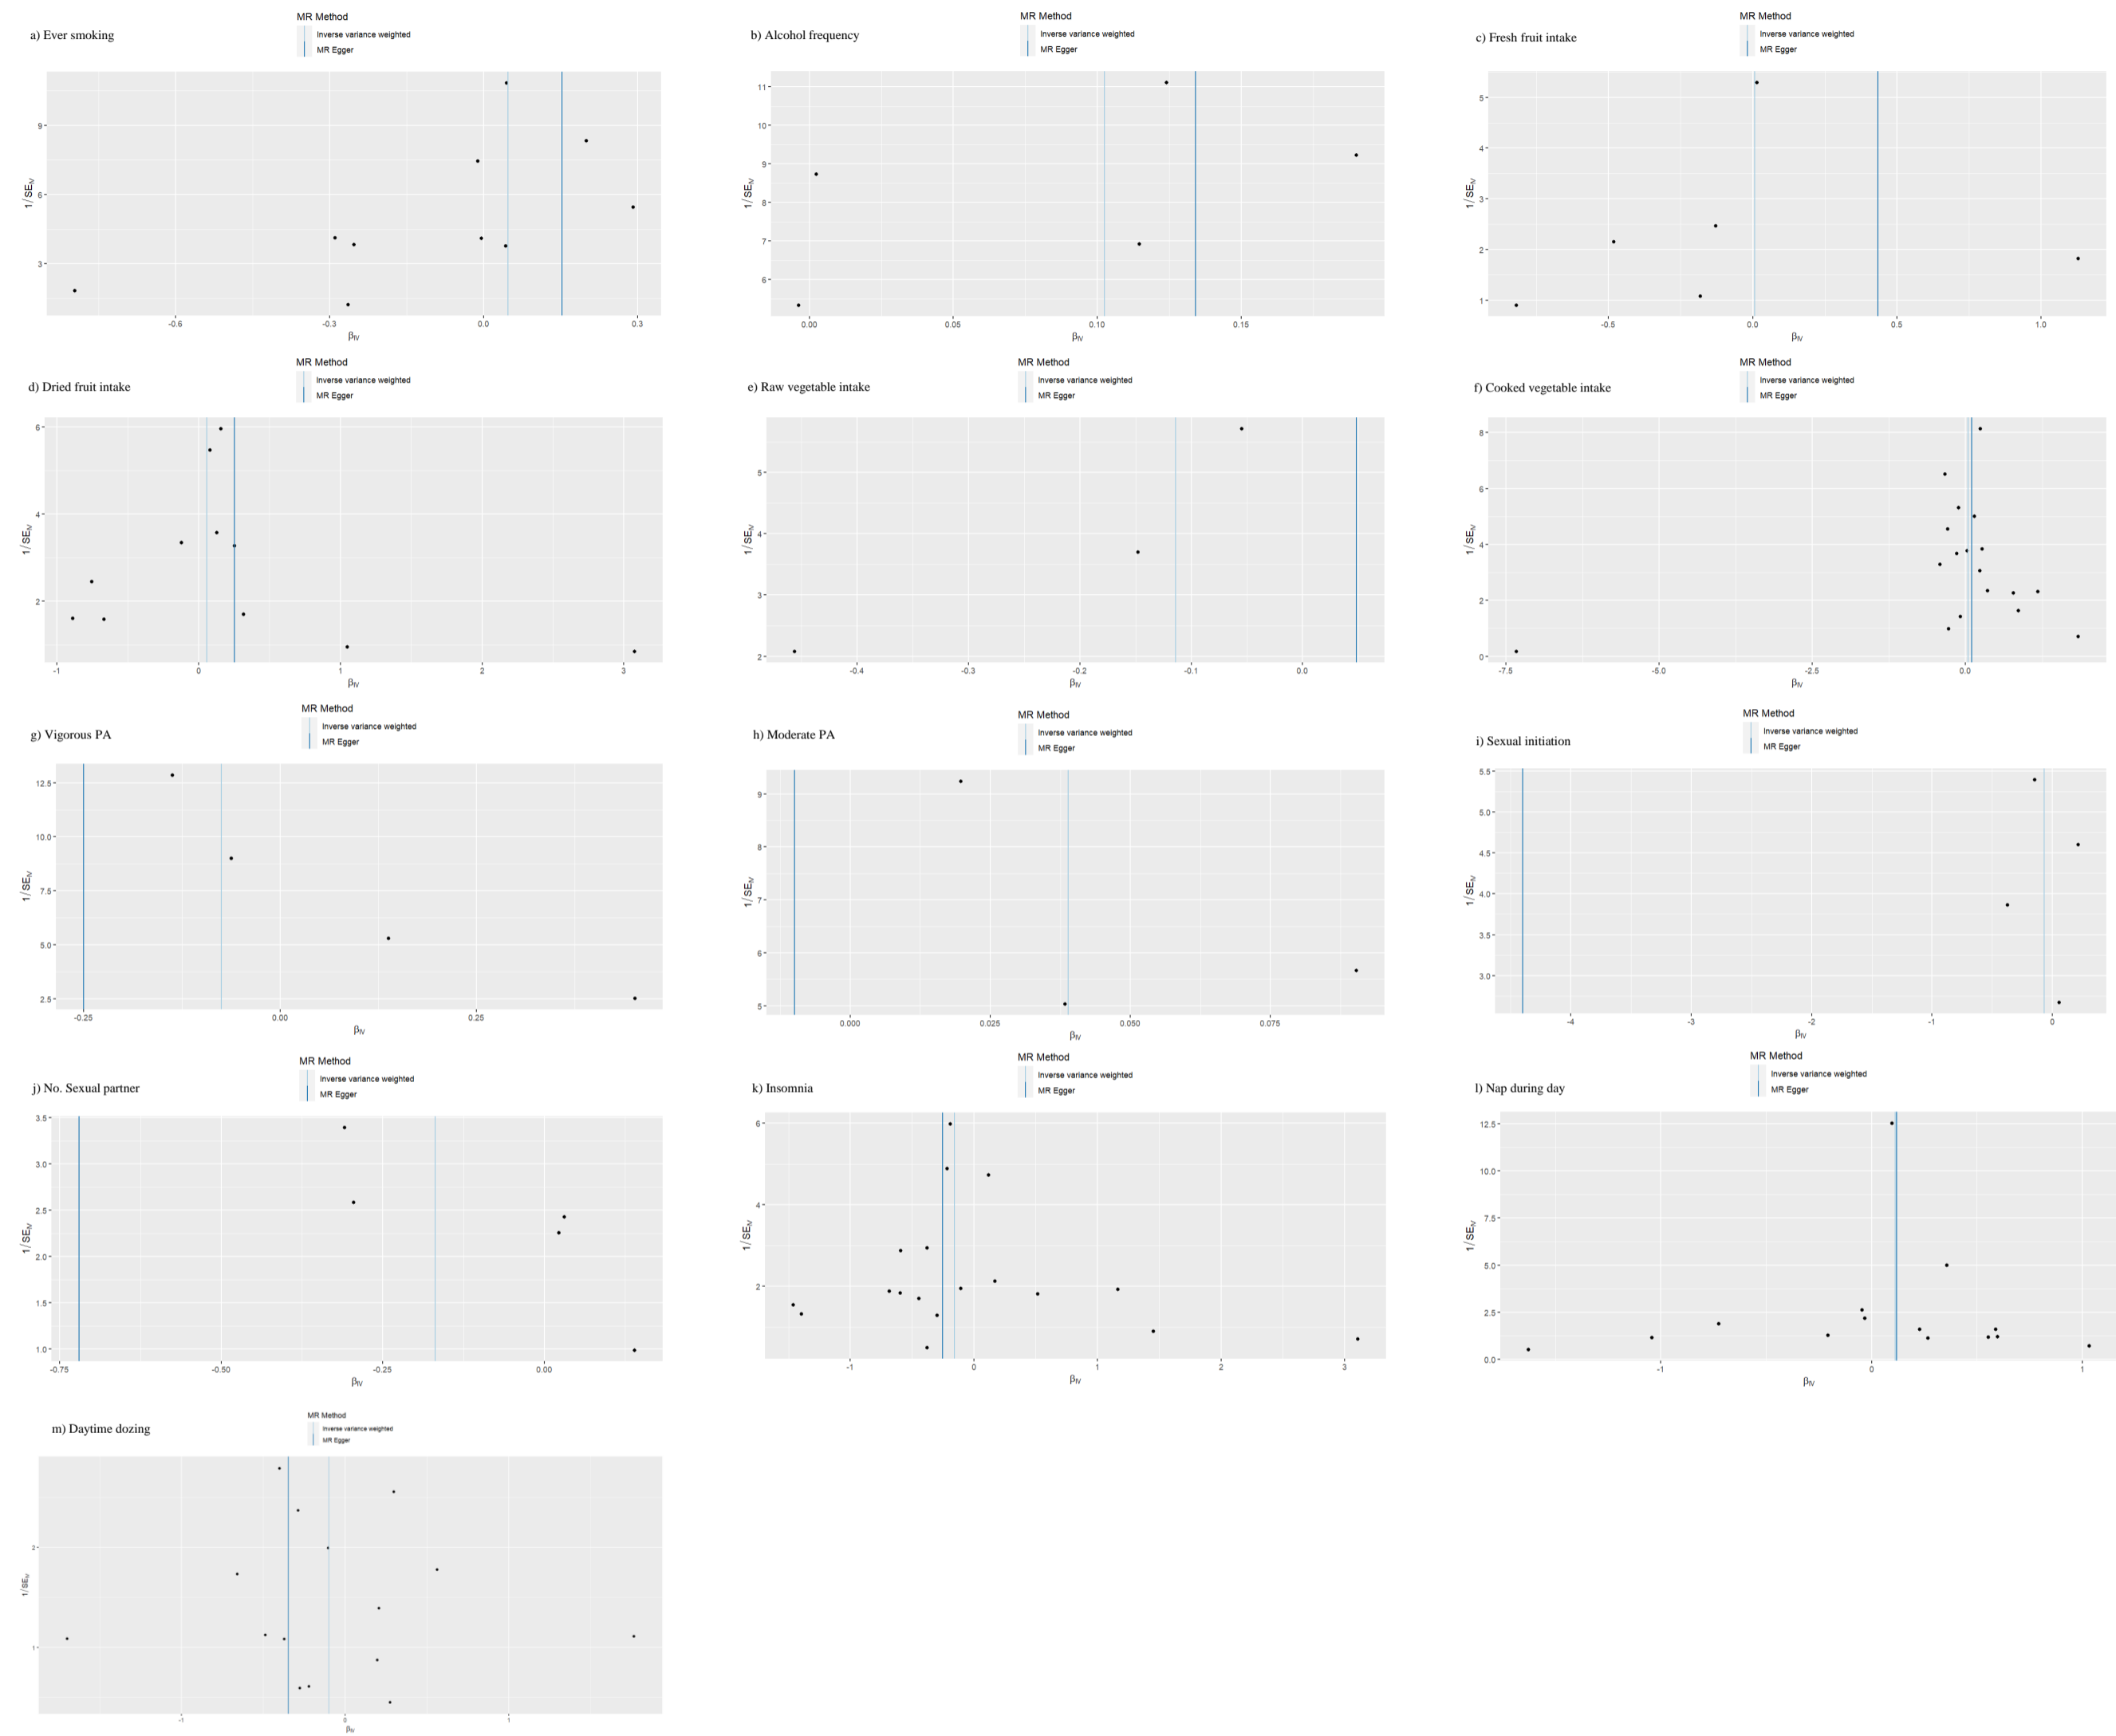

**Figure S10.** Funnel plots of each single SNP of the 12 behavioral factors in relation to PCa in the East Asian discovery sample

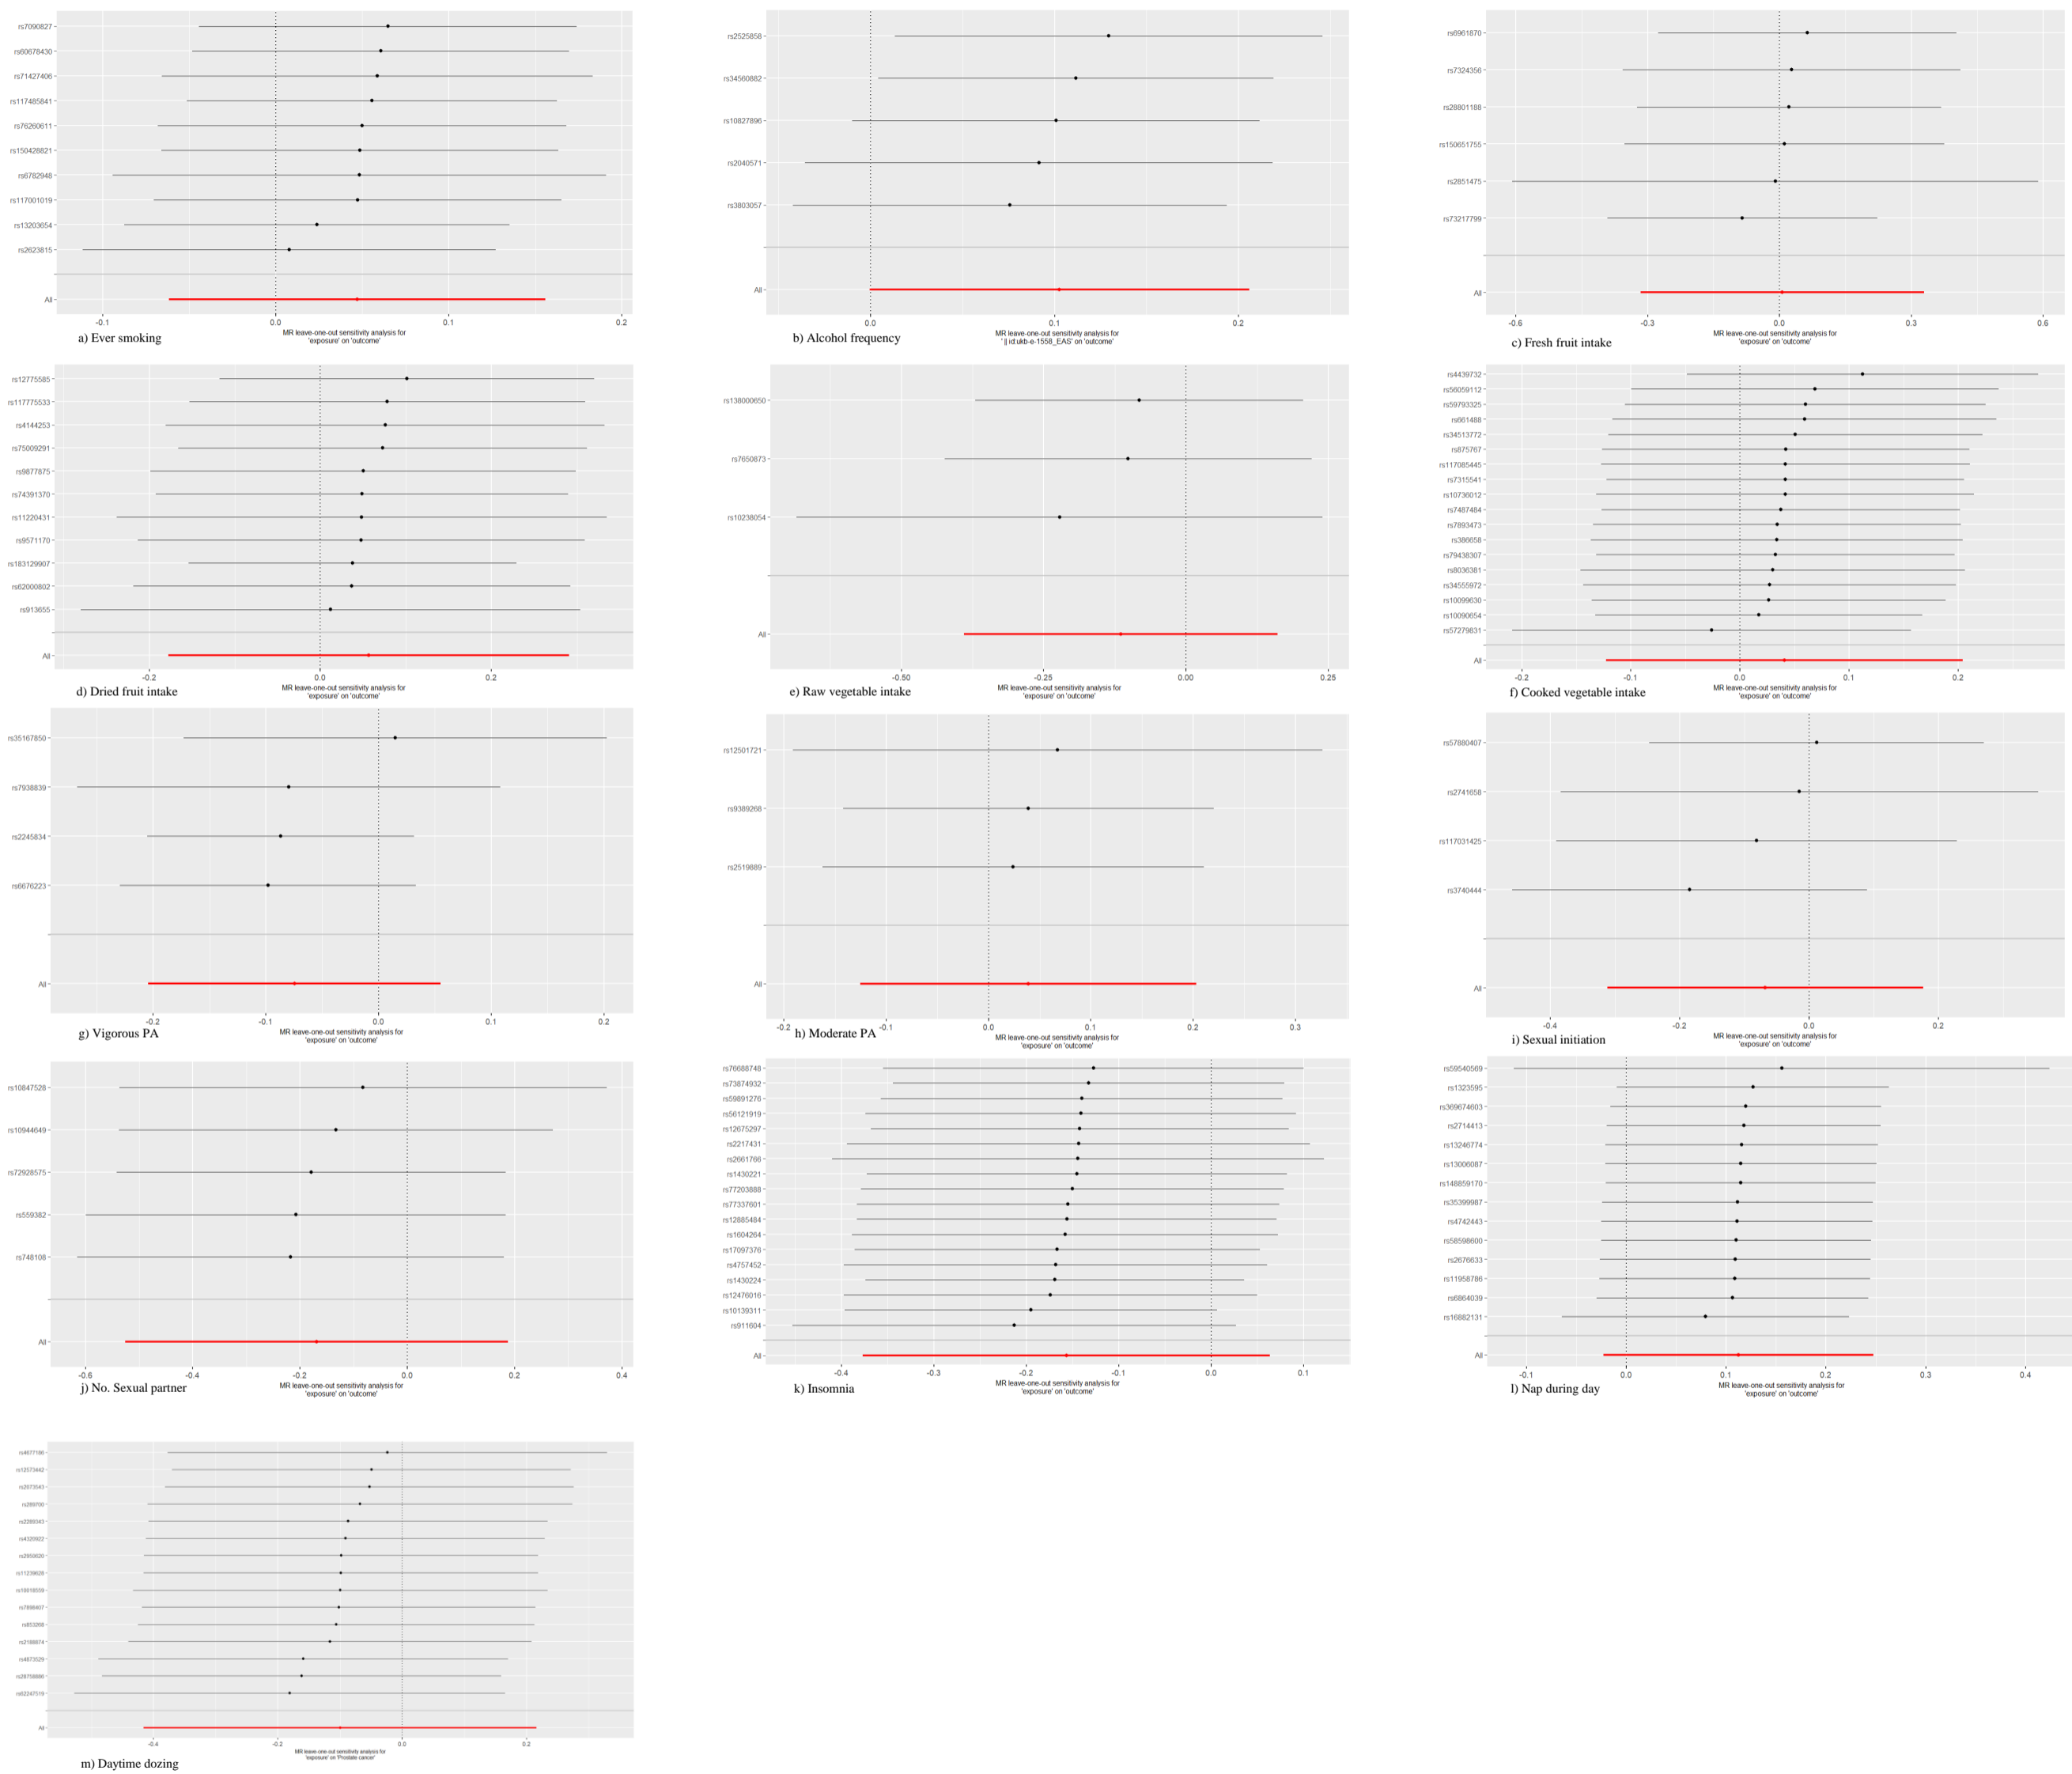

**Figure S11.** Leave-one-out analyses of the 12 behavioral factors in relation to PCa in the East Asian discovery sample

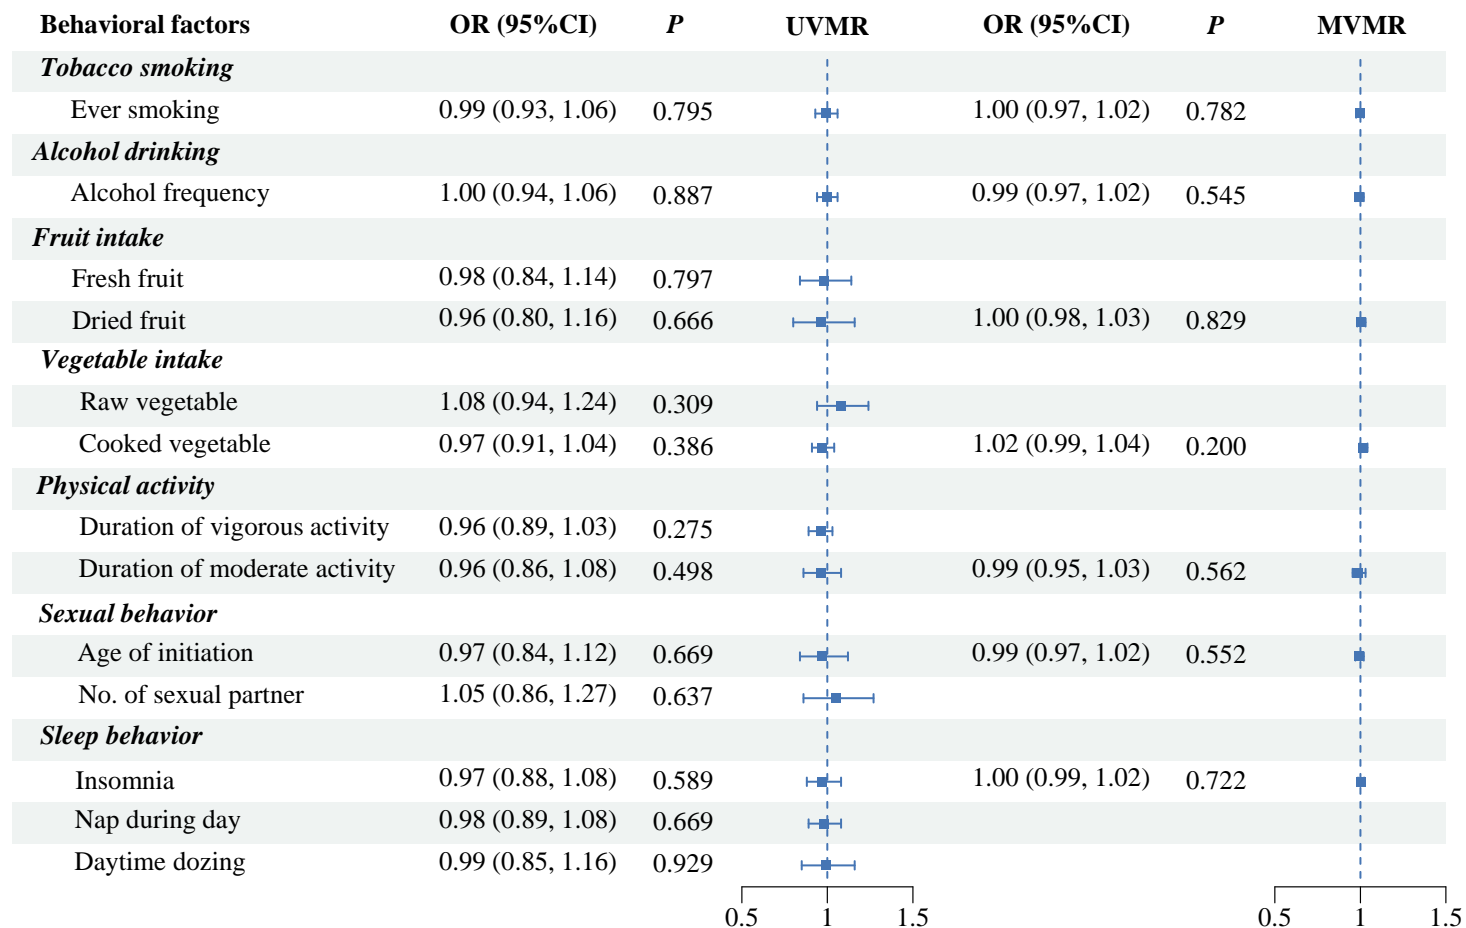

**Figure S12.** Causal effects of modifiable behaviors on prostate cancer by UVMR and MVMR in East Asian replication sample
